1 Azole resistance is mediated by integration of sterol gene regulation and membrane  
2 transporter production by the zinc cluster-containing transcription factor Upc2A in  
3 *Candida glabrata*

4

5 Bao Gia Vu<sup>1</sup>, Mark A. Stamnes<sup>1</sup>, Yu Li<sup>2</sup>, P. David Rogers<sup>2,3</sup> and W. Scott Moye-  
6 Rowley<sup>1,\*</sup>

7

8 Running title: Upc2A global transcriptional regulation

9

10

11

12

13 From: <sup>1</sup>Department of Molecular Physiology and Biophysics, Carver College of  
14 Medicine, University of Iowa, Iowa City, IA 52242 USA; <sup>2</sup>Department of Clinical  
15 Pharmacy and Translational Science, University of Tennessee Health Science Center,  
16 Memphis, TN 38163 USA.

17

18 <sup>3</sup>Current Address: Department of Pharmaceutical Sciences, St. Jude Children's  
19 Hospital, Memphis, TN 38105-3678 USA.

20

21 \*Corresponding author. E-mail: [scott-moye-rowley@uiowa.edu](mailto:scott-moye-rowley@uiowa.edu)

22

23 Draft: May 7, 2021

24 Abstract (300 words)

25 The most commonly used antifungal drugs are the azole compounds that interfere with  
26 biosynthesis of the fungal-specific sterol: ergosterol. The pathogenic yeast *Candida*  
27 *glabrata* commonly acquires resistance to azole drugs like fluconazole via mutations in  
28 a gene encoding a transcription factor called *PDR1*. These *PDR1* mutations lead to  
29 overproduction of drug transporter proteins like the ATP-binding cassette transporter  
30 Cdr1. In other *Candida* species, mutant forms of a transcription factor called Upc2 are  
31 associated with azole resistance, owing to the important role of this protein in control of  
32 expression of genes encoding enzymes involved in the ergosterol biosynthetic pathway.  
33 Recently, the *C. glabrata* Upc2A factor was demonstrated to be required for normal  
34 azole resistance, even in the presence of a hyperactive mutant form of *PDR1*. Using  
35 genome-scale approaches, we define the network of genes bound and regulated by  
36 Upc2A. By analogy to a previously described hyperactive *UPC2* mutation found in  
37 *Saccharomyces cerevisiae*, we generated a similar form of Upc2A in *C. glabrata* called  
38 G898D Upc2A. Chromatin immunoprecipitation coupled with Next Generation  
39 Sequencing (ChIP-seq) demonstrated that wild-type Upc2A binding to target genes was  
40 strongly induced by fluconazole while G898D Upc2A bound similarly, irrespective of  
41 drug treatment. We also carried out RNA-seq analysis to determine the genes that  
42 were direct or indirect targets of Upc2A transcriptional control. In addition to the well-  
43 described *ERG* genes as Upc2A transcriptional targets, we found a large group of  
44 genes encoding components of the translational apparatus along with membrane  
45 proteins. These Upc2A-regulated membrane protein-encoding genes are often targets  
46 of the Pdr1 transcription factor, demonstrating the high degree of overlap between these

47 two regulatory networks. Finally, we provide evidence that Upc2A impacts the Pdr1-  
48 Cdr1 system during the anaerobic response and also modulates resistance to  
49 caspofungin. These studies provide a new perspective of Upc2A as a master regulator  
50 of lipid and membrane protein biosynthesis.

51

52 Author summary (200 words)

53 In the pathogenic yeast *Candida glabrata*, expression of the genes encoding enzymes  
54 in the ergosterol biosynthetic pathway is controlled by the transcription factor Upc2A. *C.*  
55 *glabrata* has a low intrinsic susceptibility to azole therapy and acquires fluconazole  
56 resistance at high frequency. These azole resistant mutants typically contain  
57 substitution mutations in a gene encoding the transcription factor Pdr1. Pdr1 does not  
58 appear to regulate ergosterol genes and instead induces expression of genes encoding  
59 drug transport proteins like *CDR1*. Here we establish that extensive overlap exists  
60 between the regulatory networks defined by Upc2A and Pdr1. Genomic approaches  
61 are used to describe the hundreds of genes regulated by Upc2A that far exceed the  
62 well-described impact of this factor on genes involved in ergosterol biosynthesis. The  
63 overlap between Upc2A and Pdr1 is primarily described by co-regulation of genes  
64 encoding membrane transporters like *CDR1*. We provide evidence that Upc2A impacts  
65 the transcriptional control of the *FKS1* gene, producing a target of a second major class  
66 of antifungal drugs, the echinocandins. Our data are consistent with Upc2A playing a  
67 role as a master regulator coordinating the synthesis of membrane structural  
68 components, both at the level of lipids and proteins, to produce properly functional  
69 biological membranes.

70

71 Introduction

72 An almost inescapable problem for chemotherapy of microbes is the  
73 development of resistance. This problem is especially acute in the case of pathogenic  
74 fungi for which only 3 different drug classes exist for use in treatment of infections  
75 (reviewed in (1, 2)). The most commonly used drug class is the azole compounds, chief  
76 among these is the well-tolerated fluconazole (reviewed in (3)). Fluconazole targets  
77 ergosterol biosynthesis and has been used successfully since the 1980s but this  
78 success has led to the development of resistant organisms (recently discussed in (4)).  
79 The prevalence of fluconazole as an anti-Candidal therapy has likely contributed to the  
80 changing epidemiology of candidemias with the frequency of these fungal infections  
81 being increasingly associated with *Candida glabrata*; an increase that correlates with  
82 the introduction of fluconazole as an antifungal drug (5).

83 *C. glabrata* exhibits two features that complicate its control by fluconazole. First,  
84 this pathogen has a high intrinsic resistance to fluconazole (6). Second, high level  
85 resistant isolates easily arise that contain gain-of-function (GOF) mutations in a  
86 transcription factor-encoding gene called *PDR1* (7-9). The GOF *PDR1* alleles exhibit  
87 high levels of target gene expression and drive robust fluconazole resistance primarily  
88 through induction of expression of the ATP-binding cassette transporter-encoding gene  
89 *CDR1* (10, 11).

90 The primary species associated with candidemias is *Candida albicans* which can  
91 also acquire fluconazole resistance (recently discussed in (12)). Interestingly, the range  
92 of genes in which mutations are observed to associate with fluconazole resistance in *C.*

93 *albicans* is much wider than in *C. glabrata*. Along with mutant forms of the genes  
94 encoding the well-described transcription factors Tac1 and Mrr1 (13, 14), two additional  
95 genes in which fluconazole resistant alleles can emerge in *C. albicans* are *ERG11* (15),  
96 that encodes the enzymatic target of azole drugs, and Upc2, the primary transcriptional  
97 activator of *ERG11* and other ergosterol biosynthetic pathway genes (16). Mutations in  
98 the cognate genes for these proteins have not been found in *C. glabrata*.

99 Two important observations have recently linked *C. glabrata* Pdr1 with the  
100 ergosterol biosynthetic pathway in this yeast. First, loss of *UPC2A* (*C. glabrata*  
101 homologue of *C. albicans* *UPC2*) was sufficient to strongly reduce fluconazole  
102 resistance of a GOF *PDR1* mutant allele (17). Second, genetic means of reducing the  
103 flux through the ergosterol pathway led to induction of the Pdr pathway in a Upc2A-  
104 dependent manner (18). Together, these data indicated that fluconazole resistance in  
105 *C. glabrata* was likely to involve coordination of the Pdr1- and Upc2A-dependent  
106 transcriptional circuits.

107 Given that Upc2A interfaced with the *PDR1* and *CDR1* promoters, we wanted to  
108 determine the full spectrum of genes bound and regulated by this factor. This was  
109 accomplished using chromatin immunoprecipitation coupled with Next Generation  
110 Sequencing (ChIP-seq). We also performed RNA-seq studies to identify the Upc2A-  
111 dependent transcriptome. Using the strong sequence conservation between *S.*  
112 *cerevisiae* Upc2 and Upc2A, we constructed a GOF form of Upc2A in *C. glabrata* based  
113 on an allele described for its *S. cerevisiae* homologue (19). This mutant Upc2A drove  
114 elevated fluconazole resistance and behaved like the hyperactive *S. cerevisiae* factor.  
115 ChIP-seq data indicated Upc2A bound to roughly 1000 genes and that this binding was

116 highly induced by fluconazole. Comparison of the genes bound by Upc2A with those  
117 we previously found to be associated with Pdr1 indicated a high degree of overlap  
118 between these two target gene suites. Upc2A-mediated transcription of *PDR1* and  
119 *CDR1* was linked with the response to anaerobic growth. Transcription of the *FKS1*  
120 gene, encoding a  $\beta$ -glucan synthase protein was also found to be responsive to Upc2A,  
121 consistent with *upc2A $\Delta$*  strains being hypersensitive to caspofungin which is thought to  
122 act as a  $\beta$ -glucan synthase inhibitor (reviewed in (20)). Our data provide a new view of  
123 the global importance of Upc2A-mediated transcriptional activation as extending far  
124 beyond its well-appreciated control of *ERG* gene expression. Upc2A appears to serve  
125 as a key coordinator of the biosynthesis of membrane lipids and proteins that are  
126 destined to function in this membrane environment.

127

## 128 Results

129

### 130 **A gain-of-function form of Upc2A confers elevated fluconazole resistance.**

131 Fluconazole resistance is most commonly caused in *C. glabrata* by substitution  
132 mutations within the *PDR1* gene (See (6, 21) for a review). These mutant transcription  
133 factors exhibit enhanced target gene expression when compared to the wild-type allele.  
134 Although mutations in the *UPC2* gene in both *Saccharomyces cerevisiae* and *Candida*  
135 *albicans* have been isolated that drive fluconazole resistance (22-24), there are no gain-  
136 of-function (GOF) forms currently known for *UPC2A*. To determine if a GOF allele of  
137 *UPC2A* could be produced, we constructed an allele based on analogy with a mutation  
138 first found in *Saccharomyces cerevisiae* *UPC2* (ScUpc2) which caused the enhanced

139 function of this transcriptional regulator (25). The relevant mutation (*upc2-1*) (19) is a  
140 change of a glycine to an aspartate residue located at position (G888D) in the carboxy-  
141 terminus of ScUpc2. Alignment of *C. glabrata* Upc2A and ScUpc2 indicated that G898  
142 was the analogous position in Upc2A. This residue was replaced with an aspartate to  
143 form the G898D *UPC2A* form of the gene. The resulting mutant allele was tagged with  
144 a 3X hemagglutinin (3X HA) epitope at its amino terminus as we have previously done  
145 for the wild-type *UPC2A* gene and both these forms of *UPC2A* were integrated into an  
146 otherwise wild-type *C. glabrata* strain. These tagged strains were then grown to mid-log  
147 phase along with isogenic wild-type and *upc2AΔ* cells. Serial dilutions of each culture  
148 were placed on rich medium containing the indicated concentrations of fluconazole  
149 (Figure 1A).

150 Introduction of the G898D mutation into *UPC2A* led to the resulting factor  
151 exhibiting elevated fluconazole resistance when compared to either the tagged or  
152 untagged version of the wild-type gene. Loss of *UPC2A* caused a dramatic increase in  
153 fluconazole susceptibility. This is consistent with G898D *UPC2A* behaving as a  
154 hyperactive transcriptional activator in *C. glabrata* as has previously been seen for  
155 G888D Upc2 in *S. cerevisiae* (25).

156 To characterize the action of G898D Upc2A in control of fluconazole resistance,  
157 the expression of a range of different genes involved in this phenotype was examined  
158 by RT-qPCR. Our previous experiments have identified Upc2A as an inducer of  
159 expression of both the ATP-binding cassette transporter-encoding gene *CDR1* and the  
160 *PDR1* gene encoding a key transcriptional activator of *CDR1* (26). Levels of mRNA for

161 the *ERG11* gene, encoding the enzymatic target of fluconazole, as well as for *UPC2A*  
162 itself were also evaluated in the presence and absence of azole drug challenge.

163 The presence of the G898D *UPC2A* gene led to a strong elevation of *ERG11*  
164 transcription in the absence of fluconazole but had no significant effect on the other  
165 genes (Figure 1B). Treatment with fluconazole elevated transcription of all Upc2A  
166 target genes although the elevated *ERG11* mRNA levels seen in the absence of drug  
167 were not further induced by fluconazole when G898D Upc2A was present. The  
168 fluconazole induction of both *PDR1* and *CDR1* was enhanced by the presence of wild-  
169 type *UPC2A* relative to the presence of the GOF allele. *UPC2A* transcription was  
170 approximately two-fold elevated by fluconazole, irrespective of the *UPC2A* allele tested.

171 These same strains were then used to compare expression of their protein  
172 products by western analysis with appropriate antibodies. All strains were grown in the  
173 absence or presence of fluconazole and whole cell protein extracts prepared. These  
174 were analyzed by western blotting using the indicated antibodies (Figure 1C and D).

175 The presence of the G899D *UPC2A* allele supported normal fluconazole  
176 induction of Cdr1 and showed a modest reduction in Pdr1 activation. The levels of the  
177 wild-type and G898D forms of Upc2A were not detectably different as shown by blotting  
178 with the anti-Upc2A polyclonal antiserum. Over the time course of fluconazole  
179 challenge (two hours), no differences in the levels of these two forms of Upc2A were  
180 seen. These data argue that the increased activation seen for *ERG11* in the presence  
181 of the G898D *UPC2A* gene was due to increased function of Upc2A rather than a  
182 change in its expression compared to the wild-type factor.

183



184 **Global analysis of Upc2A transcriptional targets.** Having confirmed that the HA-  
185 tagged form of both wild-type and G898D Upc2A behaved as expected, we used these  
186 forms of Upc2A to carry out chromatin immunoprecipitation coupled with Next  
187 Generation Sequencing (ChIP-seq) to identify and compare genes that are direct  
188 transcriptional targets of Upc2A. Additionally, we assessed the effect of fluconazole  
189 induction on the suite of genes bound by either the wild-type or mutant forms of Upc2A.  
190 We also compared the binding sites found for Upc2A with those previously mapped for  
191 Pdr1 in  $\rho^0$  cells (27) to determine the degree of overlap between these two  
192 transcriptional circuits involved in fluconazole resistance. The strains used above were  
193 grown to mid-log phase under control or fluconazole-treated conditions and fixed  
194 chromatin prepared and fragmented. Chromatin was immunoprecipitated with anti-HA  
195 antibody, purified and analyzed by Illumina sequencing. Reads were mapped and  
196 peaks called by use of the MACS2 algorithm (28). We first analyzed the peaks seen in  
197 these 4 different conditions (wild-type +/- fluconazole, mutant G898D +/- fluconazole) by  
198 determining the overlap of bound genes between them (Figure 2A).

199 The Venn diagram shown illustrates the extent of overlap between each different  
200 ChIP-seq reaction. The largest number of bound genes was seen for the wild-type  
201 factor in the presence of fluconazole (>1000 promoters bound). Interestingly, there  
202 were 565 of these promoters that only be bound Upc2A in the presence of fluconazole  
203 while others were bound in multiple different conditions. The next largest group of  
204 bound promoters (309) were found to be bound under all 4 different conditions. The  
205 third largest class of promoters (85) were only bound by Upc2A under conditions we  
206 consider induced (wild-type + fluconazole and G898D Upc2A +/- fluconazole). GO term

207 enrichment analysis of these three different classes of promoters indicated that very  
208 different genes were associated with these patterns of Upc2A DNA-binding. The largest  
209 class of genes was enriched for components of the translation apparatus  
210 (Supplementary table 1A). The class of genes bound under all 4 different conditions  
211 was most predominantly enriched for proteins associated with the plasma membrane  
212 (Supplementary table 1B) while the inducible class of Upc2A-bound promoters showed  
213 the strongest enrichment for genes involved in fatty acid biosynthesis (Supplementary  
214 table 1C). While all these genes are Upc2A target loci, they exhibited unique patterns  
215 of association with this factor.

216 We used the software MEME-ChIP to search the peaks associated with binding  
217 of wild-type Upc2A in the presence of fluconazole for sequence motifs that were  
218 enriched in this collection of binding sites. We chose this condition as it represented the  
219 broadest collection of sterol response elements (SREs). We compared the MEME-ChIP  
220 output to known binding sites for Upc2 in *S. cerevisiae* (ScUpc2) (29) and refer to the  
221 binding elements for Upc2A in *C. glabrata* as SREs on the basis of their similarity to  
222 those previously described in *S. cerevisiae* (30). This analysis is shown in Figure 2B.

223 The AR1b/c elements show the variation that is tolerated by Upc2 in *S.*  
224 *cerevisiae*. These ScUpc2 SREs are most closely fit to the right-hand element of the  
225 Upc2A SRE predicted by MEME-ChIP. The central CGTA sequence is conserved  
226 between *C. glabrata* and *S. cerevisiae*, although the *C. glabrata* element has a nearby  
227 conserved element (CACAGA) that shows a relatively constant spacing. It is important  
228 to note that all analyses of *S. cerevisiae* Upc2 DNA binding were carried out before the  
229 availability of global approaches like ChIP-seq which will impact predictions of

230 consensus elements as a more limited repertoire of regulated genes was considered.

231 We examine the binding of Upc2A to its DNA target sites in detail below.

232         These data agree with the model proposed earlier that Upc2A appeared to  
233 accumulate inside the nucleus upon ergosterol limitation where the factor then binds to  
234 SRE-containing promoters (22). Since our previous work indicated overlap between  
235 Upc2A and Pdr1 target genes (26), we wanted to examine the degree of overlap  
236 between these different regulons. To make this comparison, we examined the shared  
237 Upc2A targets in cells treated with fluconazole (WTF) and the promoters bound by Pdr1  
238 in  $\rho^0$  cells (27). We selected these two conditions for comparison since both involve a  
239 signal that activates the wild-type versions of Upc2A and/or Pdr1 (fluconazole or loss of  
240 the mitochondrial genome, respectively) (8, 31). Strikingly, more than 50% of Pdr1  
241 target promoters were also associated with Upc2A binding (Figure 2C). The top 4 GO  
242 terms enriched in genes bound by both these Zn<sub>2</sub>Cys<sub>6</sub>-containing transcription factors  
243 were associated with transmembrane transport or integral membrane components  
244 (Supplementary table 2). As our earlier work had shown that both *PDR1* and *CDR1*  
245 were targets of Upc2A along with Pdr1 (18), these new data indicate that the overlap  
246 between these two transcriptional circuits extends well beyond the initial two genes.

247         Two different classes of Upc2A target promoters are shown in Figure 2D. The  
248 *ERG11* gene is an example of a locus controlled by Upc2A but not Pdr1. Binding of  
249 wild-type Upc2A is represented by the read depth and can be seen to increase in the  
250 presence of fluconazole compared to in the absence of the drug. Binding of G898D  
251 Upc2A was constant, irrespective of the presence of the drug. Note that when the lack  
252 of a change in Upc2A expression is considered (see Figure 1C), these data support the

253 view that the DNA-binding activity of wild-type but not G898D Upc2A is increased by the  
254 presence of fluconazole, possibly by an increase in nuclear localization (22).

255 *CDR1* represents a Upc2A target gene that is also regulated by Pdr1. The  
256 bound regions for Pdr1 and Upc2A extensively overlap in the upstream region of *CDR1*.  
257 Pdr1 DNA-binding was strongly upregulated in  $\rho^0$  cells, likely due in part to the large  
258 increase in *PDR1* expression in this background compared to wild-type cells (27).  
259 Upc2A DNA-binding to *CDR1* was regulated in a manner similar to that seen for  
260 *ERG11*.

261 The data above did not take into account a consideration of target gene  
262 expression. In order to link regulated Upc2A binding to changes in gene transcription of  
263 target genes, we carried out two additional analyses. First, we used software contained  
264 within the MACS2 algorithm called BDGdiff (28) that examines ChIP-seq data and  
265 identifies peaks that exhibit significant binding differences in the comparison of data  
266 from fluconazole-treated cells versus untreated cells. Secondly, RNA-seq assays were  
267 performed on isogenic wild-type and *upc2A* $\Delta$  cells in the presence and absence of  
268 fluconazole. RNA-seq data were processed and we focused on genes that had an  
269 adjusted P-value of <0.05 and significantly up-regulated by at least two-fold. These  
270 data are summarized in Figure 3 and included in supplementary table 3.

271 Figure 3A represents the union of all genes that are induced in the presence of  
272 fluconazole in either wild-type or *upc2A* $\Delta$  cells with genes that exhibited a significant  
273 increase in Upc2A DNA-binding when comparing ChIP-seq data from cells grown in the  
274 presence of fluconazole versus the absence of drug. Strikingly, only 53 genes required  
275 the presence of Upc2A DNA-binding to be induced by fluconazole while 274 were

276 induced either in the presence or the absence of the *UPC2A* gene, although all these  
277 genes were bound by Upc2A. The majority of fluconazole-induced genes (542) were  
278 not dependent on the presence of Upc2A while 64 genes were fluconazole-induced,  
279 required the presence of Upc2A but were not bound by this factor.

280         These data argue that the vast number of fluconazole-induced genes do not  
281 depend on the presence of Upc2A. However, there are 117 genes that are only FLC-  
282 inducible in the presence of Upc2A. The only GO term enriched in the 64 genes that  
283 require the presence of Upc2A for FLC induction (yet are not bound by Upc2A)  
284 represent loci involved in ergosterol biosynthesis. These Upc2A-dependent but indirect  
285 targets include *ERG4*, *ERG8*, *ERG9*, *ERG24*, *ERG26* and *ERG27*. *ERG8* is in the  
286 earlier part of the ergosterol biosynthetic pathway while all other enzymes participate in  
287 the conversion of farnesyl pyrophosphate to ergosterol (recently reviewed in (32)).

288         The simplest class of fluconazole-induced genes are represented by the 53 direct  
289 target genes. GO terms enriched in this set of genes included ergosterol biosynthesis,  
290 plasma membrane and cell wall biogenesis, membrane transport, sterol uptake and  
291 RNA polymerase II core promoter-binding factors. The genes in this class of enriched  
292 genes include *UPC2B* and homologues of *S. cerevisiae* *NRG2* and *ADR1*. These  
293 factors may be involved in regulation of genes that are controlled indirectly by Upc2A.

294         The other two categories of fluconazole-regulated Upc2A-bound genes were  
295 either induced in both wild-type and *upc2AΔ* cells (201 genes) or only in the absence of  
296 *UPC2A* (73 genes). Only the group of 201 genes showed any significant GO term  
297 enrichment with specific groups of genes involved in the response to stress and  
298 glycogen catabolism being the top two categories.

299           The final and largest class of genes found to be bound by Upc2A were less than  
300 two-fold induced by fluconazole. GO term analysis of this class of genes indicated that  
301 the top three enriched categories were involved in translation and the ribosome (60  
302 total). The next highest categories were plasma membrane or amino acid  
303 transmembrane transport and represented 74 genes. Together, these data strongly  
304 suggest that Upc2A impacts a wide range of cellular process as well as its well-  
305 described control of expression of genes involved in the ergosterol biosynthetic  
306 pathway.

307           To examine the range of expression of Upc2A-responsive genes, we compared  
308 the transcriptional response of a range of genes from the *ERG* pathway with loci that we  
309 have previously found to be targets of Pdr1 in *C. glabrata* (27). This comparison is  
310 presented in the form of a heat map (Figure 3B).

311           The majority of *ERG* genes showed at least two-fold induction by fluconazole in  
312 wild-type cells as long as these genes corresponded to steps later in the ergosterol  
313 biosynthetic pathway. *ERG10*, *ERG13*, *HMG1* and *ERG20*, which all encode early  
314 steps in ergosterol biosynthesis, were not influenced by fluconazole challenge in wild-  
315 type cells although expression of these genes was strongly depressed under these  
316 same conditions in the absence of *UPC2A*. Genes encoding enzymes that function  
317 later in ergosterol biosynthesis (like *ERG11*) were induced by fluconazole at least two-  
318 fold in wild-type cells but depressed by at least two-fold in a *upc2AΔ* background.

319           There were two *ERG* genes that were exceptions to these general trends of  
320 regulation. *ERG1*, one of the genes showing the best induction by fluconazole in wild-  
321 type cells and most prominent peak of Upc2A ChIP-seq density, was similarly drug

322 induced in both wild-type and *upc2A* $\Delta$  cells. *ERG8*, encoding an enzyme that functions  
323 early in the ergosterol pathway, was also similarly fluconazole-induced in both gene  
324 backgrounds, irrespective of the presence of Upc2A. Strikingly, *ERG8* was not seen to  
325 contain a detectable ChIP-seq peak for Upc2A binding. We interpret these complex  
326 responses to fluconazole treatment in *C. glabrata* as evidence for a multifactorial  
327 transcriptional network regulating *ERG* gene expression in which Upc2A participates as  
328 both a direct (later pathway genes) and indirect (early pathway genes) regulator.

329 Pdr1-regulated genes that were also associated with SREs exhibited less  
330 dependence on the presence of Upc2A for fluconazole induction than seen for most  
331 *ERG* genes. *CDR1* fluconazole induction was reduced upon loss of Upc2A but *PDR1*  
332 was similarly induced irrespective of the *UPC2A* background (Figure 3B). *SNQ2* and  
333 *PDH1* were reduced to approximately 50% of their normal drug-induced levels in the  
334 *upc2A* $\Delta$  strain while *QDR2* and *RTA1* showed higher levels of fluconazole induction in  
335 the same strain. Two other Pdr1 target genes (*PDR16*, *RSB1*) were repressed by the  
336 presence of fluconazole in wild-type cells and their expression lowered further when  
337 *upc2A* $\Delta$  cells were treated with fluconazole.

338 We also used RNA-seq to compare the gene expression profile of wild-type cells  
339 to an isogenic G898D *UPC2A* strain. These strains were grown to mid-log phase in the  
340 absence of fluconazole and then standard RNA-seq was carried out to determine the  
341 effects of this form of Upc2A on the transcriptome (Table 2).

342 The presence of the GOF form of *UPC2A* caused relatively small changes in  
343 gene transcription. There were only 11 genes observed to be elevated at least 1.4-fold.  
344 A striking feature shared by these genes was that nine of eleven encoded products that

345 were involved in the biosynthesis of ergosterol. Five of these 9 genes also contained  
346 SREs. As we have seen for *ERG11* (Figure 1B and C), the presence of the G898D  
347 Upc2A protein led to enhanced expression of multiple genes involved in ergosterol  
348 biosynthesis. This coordinate up-regulation is likely responsible for the observed  
349 increase in fluconazole resistance caused by this allele.

350

351 **Identification of functional SREs in Upc2A target genes.** To confirm that the SREs  
352 present in the direct Upc2A target genes were required for normal in vivo functions, we  
353 both mapped the location of several SREs and prepared mutant versions of these sites  
354 that could not normally interact with Upc2A. DNase I protection assays with a  
355 recombinant form of the Upc2A DNA-binding domain were used to locate each SRE at  
356 nucleotide resolution. Radioactive probes were prepared from SREs contained in the  
357 *ERG1*, *CDR1* and *PDR1* promoters. These probes were used in a DNase I protection  
358 mapping experiment to locate the bounds of the region protected by Upc2A from  
359 nuclease digestion. The DNase I ladders were electrophoresed in parallel with  
360 chemical sequencing reactions on the same probe in order to locate the SRE. These  
361 data are shown in Figure 4.

362 The *ERG1* promoter, which contains an everted pair of SREs (Figure 4A),  
363 showed the largest protected region of DNA and a strong DNase I hypersensitive site  
364 located immediately upstream of the SRE (Figure 4B). The *CDR1* SRE exhibited two  
365 DNase I hypersensitive sites linked to Upc2A binding while the *PDR1* SRE showed a  
366 clear protected region but no associated hypersensitive site.



367           Now that we could localize the SREs in each of these promoters to a relatively  
368 small segment of DNA, we mutagenized each to confirm its requirement for in vitro  
369 binding. To confirm that the predicted SREs were key for Upc2A binding, we used an  
370 electrophoretic mobility shift assay (EMSA) and prepared wild-type and mutant probes  
371 containing each SRE. Each probe was incubated with Upc2A and then resolved using  
372 nondenaturing electrophoresis. Bound and unbound probe was detected using a biotin  
373 moiety attached to the end of each probe. The results of this assay are shown in Figure  
374 4C.

375           The wild-type *ERG1* probe produced two different species of protein:DNA  
376 complex, possibly corresponding to either one or two binding sites being occupied with  
377 Upc2A. The mutant form of this SRE blocked formation of both complexes. *CDR1* and  
378 *PDR1* probes both formed primarily a single size of complex that was greatly diminished  
379 when the mutant SRE probe was used. These data argue that the SREs indicated in  
380 Figure 4A are likely required for Upc2A binding to each promoter.

381  
382 **Phenotypes caused by loss of SRE function.** To validate the importance of the  
383 SREs identified in *ERG1*, *CDR1* and *PDR1*, we prepared versions of these promoters  
384 that contained the mutations shown to block in vitro binding of Upc2A. These DNA-  
385 binding defective SREs (mSRE) were first introduced, along with their wild-type  
386 promoter, into a *lacZ* fusion plasmid to allow comparison of the expression supported by  
387 wild-type promoters to those that lacking Upc2A binding. These plasmids were  
388 transformed into wild-type cells, then grown to mid-log phase and challenged with or

389 without fluconazole. *C. glabrata* promoter-dependent  $\beta$ -galactosidase activity was then  
390 determined.

391 Introduction of the mSRE into *ERG1*, *CDR1* or *PDR1* promoters led to a  
392 reduction in the level of fluconazole-induced  $\beta$ -galactosidase activity produced by each  
393 respective fusion gene (Figure 5A). While some degree of fluconazole inducibility was  
394 retained in each mSRE-containing promoter, these data indicate that each SRE  
395 identified above is required for normal drug induced promoter activation.

396 To examine the effect of the loss of the SRE from the wild-type *CDR1* and *PDR1*  
397 genes, the mSRE mutations were introduced into otherwise wild-type versions of these  
398 two genes. Isogenic wild-type and mSRE versions of the *PDR1* locus were prepared by  
399 recombination into the normal chromosomal location of this gene in a strain containing a  
400 null allele of *CDR1*. Low-copy-number plasmids containing *CDR1* were constructed  
401 that varied only by the form of the SRE that was contained in the promoter region.  
402 These two different forms of *CDR1* were introduced into the wild-type and mSRE *PDR1*  
403 *cdr1* $\Delta$  strain and transformants grown in the presence or absence of fluconazole.  
404 Whole cell protein extracts were prepared and examined for expression of proteins of  
405 interest using appropriate polyclonal antisera (Figure 5B).

406 Loss of the SRE from the *CDR1* promoter caused a significant drop in expression  
407 when cells were treated with fluconazole that was enhanced when combined with the  
408 mSRE version of the *PDR1* gene. Similar reductions in Cdr1 levels were seen in the  
409 absence of fluconazole, again with removal of the SRE from both *CDR1* and *PDR1*  
410 causing the largest reduction in Cdr1 levels. Expression of Pdr1 was not affected when  
411 the *CDR1* SRE was removed but fluconazole induction of Pdr1 was reduced when the

412 SRE was removed from the *PDR1* promoter. Expression of Erg11 was unaffected in  
413 these backgrounds as these alterations were restricted to the *CDR1* and *PDR1*  
414 promoters.

415 These strains were also evaluated for their drug resistance phenotype using a  
416 serial dilution assay on fluconazole-containing media (Figure 5C). The major reduction  
417 in fluconazole resistance was caused by the presence of the mSRE-containing form of  
418 the *CDR1* gene. This was modestly enhanced by the simultaneous loss of the SRE  
419 from the *PDR1* gene. Together, these data demonstrate that the SREs present in  
420 *CDR1* and *PDR1* are required for normal expression of these genes and for full  
421 fluconazole resistance.

422

423 **Potential role for Pdr1/*CDR1* in anaerobic growth.** The above data continue to  
424 support the notion that the Pdr pathway in *C. glabrata* is linked to levels of ergosterol as  
425 we have argued previously (18). We wondered if a physiological parameter, key for  
426 ergosterol biosynthesis, might also involve the Pdr pathway. To test this possibility, we  
427 examined the effect of anaerobic growth on *PDR1* and *CDR1* expression. Oxygen is  
428 essential for normal ergosterol biosynthesis and anaerobic growth triggers rapid  
429 induction of *ERG* gene expression in several fungi, including *C. glabrata* (33). We also  
430 evaluated the requirement for the presence of *PDR1* and *CDR1* during anaerobic  
431 growth to test their contribution to this phenotype.

432 We validated our conditions of anaerobic growth by measuring the expression of  
433 several genes known from work in *S. cerevisiae* to be induced under these conditions,  
434 along with others that were repressed in the absence of oxygen (34). Wild-type cells

435 were grown aerobically or anaerobically, total RNA prepared and levels of mRNAs  
436 assessed by RT-qPCR analyses.

437         Anaerobic growth led to 20-fold or higher induction of the genes corresponding to  
438 products important in sterol uptake such as the ABC transporter Aus1 and other  
439 proteins thought to be essential for this process (Dan1, Tir1) (Figure 6A). Anaerobic  
440 growth also repressed expression of genes encoding mitochondrial proteins involved in  
441 ATPase production (Atp3, Atp4) and an electron transport chain component (Sdh2).  
442 Two different loci encoding enzyme involved in the tricarboxylic acid cycle were slightly  
443 reduced (*KGD2*) or unaffected (*ACO1*).

444         Having confirmed that the expected anaerobic gene regulation was seen under  
445 our growth conditions, we next tested expression of Cdr1, Pdr1 and Erg11 using the  
446 western blot assay described previously (Figure 6B). Both Cdr1 and Pdr1 were strongly  
447 induced, from 3- to 5-fold, while Erg11 was also induced albeit roughly 2-fold.

448         Since all these Upc2A target genes were induced in this assay, we wanted to  
449 determine if the SREs associated with *CDR1* and *PDR1* were required for this  
450 anaerobic activation. We used the strains described early in which either wild-type  
451 versions of *CDR1* and *PDR1* were present or these same genes containing mutations in  
452 their respective SREs were used. These isogenic strains were grown in the presence  
453 or absence of oxygen and levels of Cdr1, Pdr1 and Erg11 (as a control for anaerobic  
454 conditions) measured by western blotting.

455         Anaerobic induction of both Cdr1 and Pdr1 was diminished in the absence of the  
456 SRE motifs in their promoters (Figure 6C). As seen before for fluconazole challenge,

457 the SREs in the *CDR1* and *PDR1* promoters are required for normal induction. Erg11  
458 was not affected as its SRE was unaltered in this experiment.

459 To test if the expression of *CDR1* and *PDR1* was involved in normal anaerobic  
460 growth, we carried out a competitive growth assay. Isogenic wild-type and double  
461 mutant *cdr1* $\Delta$  *pdr1* $\Delta$  strains were mixed in equal portions and then grown under either  
462 aerobic or anaerobic conditions. Once these mixed cultures had reached the end of log  
463 phase growth, aliquots were plated to determine if the percentage of the populations  
464 had changed.

465 The loss of *CDR1* and *PDR1* caused the resulting double mutant strain to exhibit  
466 a growth disadvantage when competed with the wild-type parent (Figure 6D) but only  
467 under anaerobic conditions. No change from the starting population was seen during  
468 aerobic growth. These data provide evidence that Upc2A-regulated expression of both  
469 *CDR1* and *PDR1* is required for normal anaerobic growth, linking the function of these  
470 two genes to this phenotype for the first time.

471  
472 **Role for Upc2A in caspofungin resistance.** The ChIP-seq data predicted a potential  
473 SRE upstream of the *FKS1* and *FKS2* genes (Supplementary tables 1 and 2). To  
474 determine if these putative SREs had detectable roles in expression of the caspofungin  
475 resistance phenotype, we tested the ability of an isogenic set of strains varying in their  
476 *UPC2A* allele for the response to several different cell wall stress agents. Isogenic wild-  
477 type, *upc2A* $\Delta$  or epitope-tagged wild-type or G898D *UPC2A*-containing strains were  
478 tested for resistance to caspofungin, caffeine or high pH using a serial dilution assay.  
479 Caffeine and high pH are cell wall stresses and reflect general cell wall dysfunction (35).

480           Loss of *UPC2A* caused hypersensitivity to all these agents (Figure 7A) while both  
481 epitope-tagged alleles behaved like the wild-type strain. The finding of a caspofungin  
482 susceptible phenotype prompted us to examine expression of the three *FKS* genes in *C.*  
483 *glabrata* to determine if any of these showed a response to the G898D allele of *UPC2A*.  
484 None of these genes were altered in the presence of this gain-of-function form of  
485 *UPC2A* while both *ERG1* and *AUS1* were elevated (Figure 7B), confirming the  
486 functionality of this hypermorphic form of Upc2A.

487           To explain the observed caspofungin hypersensitivity of the *upc2AΔ* strain, levels  
488 of *FKS1* and *FKS2* mRNAs were measured using RT-qPCR in the presence or absence  
489 of caspofungin. Loss of *UPC2A* reduced basal expression of *FKS1* and had a modest  
490 effect on *FKS2* (Figure 7C). The addition of caspofungin strongly induced *FKS2*  
491 expression as expected (36) with this induction unaffected by the absence of Upc2A.

492           Since a defect was seen for *FKS1* expression, we prepared a DNA probe  
493 containing the putative SRE in this promoter for use in an EMSA to determine if  
494 recombinant Upc2A was able to recognize this element in vitro (Figure 7D). A mutant  
495 form of this SRE was also tested in this EMSA. The wild-type *FKS1* probe was strongly  
496 reduced in mobility when incubated with Upc2A while the mSRE-containing probe  
497 exhibited a band of reduced intensity upon loss of this sequence element.

498           To determine if the SRE was required for normal expression of *FKS1*, a *lacZ*  
499 translational fusion gene was prepared in which the *FKS1* regulatory region determined  
500 expression of  $\beta$ -galactosidase. Both the wild-type and mSRE-containing *FKS1*  
501 promoters were used and introduced on a low-copy-number plasmid into wild-type *C.*

502 *glabrata* cells. *FKS1*-dependent  $\beta$ -galactosidase activities were then determined in the  
503 presence or absence of caspofungin induction.

504 Loss of the SRE from the *FKS1* promoter caused a significant reduction in *FKS1*-  
505 dependent expression of *lacZ* in the absence of caspofungin (Figure 7E). These data  
506 provide evidence that Upc2A-mediated gene activation is required for normal  
507 expression of *FKS1* and wild-type caspofungin resistance.

508

## 509 Discussion

510 These data provide important new appreciation for the expansive role of Upc2A  
511 in control of gene expression. Extensive previous work on Upc2A homologues in both  
512 *S. cerevisiae* and *C. albicans* was generally done prior to the availability of modern  
513 genomic approaches like ChIP- and RNA-seq (reviewed in (37)). Detailed analyses  
514 demonstrated the crucial role of these Upc2A-like factors in regulation of *ERG* gene  
515 biosynthesis (30, 38, 39)) but little was known about the full range of their target genes.  
516 A ChIP-chip experiment was carried out on *C. albicans* Upc2 and this factor was found  
517 to associate with the *CDR1* gene in this species (40). To the best of our knowledge,  
518 there has been no follow-up linking *C. albicans* Upc2 with the Tac1 transcription factor  
519 (key regulator of *CDR1* transcription) or *S. cerevisiae* Upc2 with either ScPDR1 or  
520 ScPDR3. This suggests the possibility that this *C. glabrata* connection between Upc2A  
521 and Pdr1 is a unique feature of this yeast and could help explain the high level of  
522 intrinsic azole resistance seen in this organism.

523 The large number of Upc2A target genes illustrates the breadth of processes that  
524 are transcriptionally influenced by this factor. Clearly, the *ERG* genes are an important

525 set of genetic targets but these are a small fraction of the whole. Upc2A appears to be  
526 coordinating a broad group of genes including a large number of plasma membrane-  
527 localized proteins (See supplementary table 1 and 3). Coupled with its control of  
528 ergosterol in this membrane, Upc2A appears to be a central determinant of the  
529 composition of this membrane compartment in *C. glabrata*. The regulation of plasma  
530 membrane constituents is of obvious importance in modulating the ability of substances  
531 to cross this barrier between the external and internal environments.

532 Comparing the members of the target gene sets defined by Upc2A and Pdr1  
533 suggests a hierarchical relationship between these two transcription factors. Here we  
534 establish that a binding site for Upc2A lies upstream of *PDR1* and is required for normal  
535 activation of *PDR1* expression (Figure 6C) as well as many of the other genes  
536 controlled directly by Pdr1. We suggest Upc2A provides overarching control of both the  
537 Pdr1 regulon but also a variety of other genes that are not under Pdr1 control, serving to  
538 link these different classes of genes through this common transcriptional regulation.

539 While the full range of Upc2A target genes illustrate the global importance of this  
540 transcription factor, the *ERG* genes are especially sensitive to the level of activity of this  
541 regulator. The G898D *UPC2A* allele has a surprisingly limited effect on gene  
542 expression as this allele was seen to trigger significant transcriptional changes almost  
543 exclusively in genes associated with ergosterol biosynthesis (Table 2). It is possible  
544 that the transcriptional impact of the G898D Upc2A could be expanded if cells were  
545 treated with fluconazole as ergosterol limitation might be able to impact expression by  
546 regulatory inputs beyond Upc2A. Experiments to test this possibility are underway.



547 Construction and analysis of G898D Upc2A demonstrated that there is no  
548 particular prohibition on hyperactive alleles of *UPC2A* existing in this pathogenic yeast.  
549 The *S. cerevisiae UPC2-1* allele, from we derived the G898D *UPC2A*, was originally  
550 isolated on the basis of permitting aerobic sterol uptake (19). Strikingly, no other *S.*  
551 *cerevisiae UPC2* hypermorphic alleles are known. *UPC2* mutations in *C. albicans* have  
552 been found in multiple clinical strains and appear to be much more commonly isolated  
553 (23, 24). An interesting feature of the majority of *C. albicans UPC2* GOF alleles is these  
554 all cluster with a region of the protein between residues 642 and 648 (16). This region  
555 shows strong sequence conservation with the 893-898 region of *C. glabrata Upc2A*.  
556 The conserved location of these hypermorphic alleles suggests the possibility that a  
557 common function is being disrupted in both organisms.

558 Based on detailed structural and subcellular localization studies on *S. cerevisiae*  
559 Upc2 (22), we propose that *C. glabrata Upc2A* accumulates in the nucleus upon  
560 ergosterol limitation. Our data support this assertion in two ways. First, a large  
561 increase in ChIP-seq peaks is seen for Upc2A when azole-treated cells are compared  
562 to untreated cells. Second, the G898D Upc2A mutant protein shows constitutively high  
563 number of ChIP-seq peaks that is not significantly altered by azole challenge. These  
564 data are consistent with a model in which Upc2A nuclear accumulation is enhanced  
565 upon ergosterol limitation and this regulation requires the function of the region  
566 containing G898 in the C-terminus of this factor.

567 The finding of the interaction between Upc2A and the *FKS1* gene provides an  
568 interesting connection between azole resistance, well-known to be impacted by Upc2A  
569 (41), and echinocandin resistance. These two antifungal drugs have been considered

570 to be defined by genetically separable pathways but here we provide evidence that  
571 Upc2A may provide a link between them. Intervention in Upc2A-mediated  
572 transcriptional activation may be able to cause reductions in resistance to both azole  
573 drugs and the echinocandins.

574 Finally, our data also illuminate the complexity and interrelationship of expression  
575 of genes involved in ergosterol biosynthesis with plasma membrane proteins and even  
576 the cell wall. *ERG* gene regulation is an important task for Upc2A but this factor clearly  
577 impacts transcription of a broad range of genes affecting multiple aspects of the plasma  
578 membrane. Additionally, loss of Upc2A has clear phenotypes but is certainly not the  
579 only regulator of *ERG* gene expression and fluconazole induction in *C. glabrata*. Loss  
580 of *UPC2A* leads to a profound increase in fluconazole susceptibility, even in the  
581 presence of a GOF form of *PDR1* (17). However, only ~50 genes were both bound by  
582 Upc2A and dependent on Upc2A for fluconazole induction while 880 were induced in  
583 the presence of fluconazole independent of Upc2A (Figure 3A). This provides an  
584 illustration of the overlapping modes of regulation controlling gene expression in  
585 response to ergosterol limitation. The importance of ergosterol production and its  
586 synchronization with biogenesis of membrane proteins in the plasma membrane is  
587 central to a fungal cell producing a normally functioning membrane that can allow  
588 growth. Understanding this regulatory circuitry will allow interventions to be developed  
589 that can restore and potentially even enhance azole susceptibility, allowing the use of  
590 this highly effective antifungal drug to be maintained.

591

592

593 **Materials and Methods**

594

595 **Strains and growth conditions.** *C. glabrata* was routinely grown in rich YPD medium  
596 [1% yeast extract, 2% peptone, 2% glucose] or under amino acid-selective conditions in  
597 complete supplemental medium (CSM) (Difco yeast nitrogen extract without amino  
598 acids, amino acid powder from Sunrise Science Products, 2% glucose). All solid media  
599 contained 1.5% agar. Nourseothricin (Jena Bioscience, Jena, Germany) was  
600 supplemented to YPD media at 50 µg/ml to select for strains containing the pBV133  
601 vector (26) and its derivatives. All strains used in this study are listed in table 1.

602

603 **Plasmid construction and promoter mutagenesis.** All constructs used for  
604 homologous recombination into the chromosome were constructed in a pUC19 plasmid  
605 vector (New England Biolabs, Ipswich, MA). PCR was used to amplify DNA fragments  
606 and Gibson assembly cloning (New England Biolabs) employed to assemble fragments  
607 together. All isogenic deletion constructs were made by assembling the recyclable  
608 cassette from pBV65 (26) and fragments from the immediate upstream/ downstream  
609 regions of the target genes. Eviction of the recyclable cassette left a single copy of loxP  
610 in place of the excised target gene coding region. Sequences of the repeated influenza  
611 hemagglutinin epitope tag (3X HA) was PCR amplified from BVGC3 background (26).  
612 This tag element was inserted before the start codon of *UPC2A* and G898D *UPC2A* with  
613 an addition of repeated 3X glycine-alanine linker sequence located between the 3X HA  
614 tag and the gene coding sequence. The G898D mutation in *UPC2A* was made by

615 Gibson assembly in which the overlapping primers contained the point mutation  
616 sequence.

617

618 Gene complementation constructs were made by Gibson assembling the fragments  
619 from the immediate upstream and downstream regions of the target genes [overlapping  
620 regions], coding region of the target genes, target gene terminators (about 250 base-  
621 pairs after the translation stop codon), and the recyclable cassette (located after the  
622 terminator). Eviction of the recyclable cassette in the complementation constructs left a  
623 single copy of loxP about 250 base-pairs downstream of the target gene stop codons.  
624 Complementation of *LEU2* was done by PCR amplifying the *LEU2* coding region and  
625 500 base-pairs immediate upstream and downstream of the coding region from the  
626 CBS138 background. Linear DNA was then transformed into KKY2001 and the colonies  
627 were selected on CSM agar without Leucine.

628

629 All autonomous plasmids were derived from pBV133 (26) carrying nourseothricin  
630 marker. The *lacZ* gene encoding the *E. coli*  $\beta$ -galactosidase gene was amplified from  
631 pSK80 (42). *ERG1*, *CDR1*, *PDR1* promoter fragments were amplified from the  
632 KKY2001 background. The *CDR1* minimal promoter, which was fused to *lacZ*,  
633 contained the -1 to -1076 region (with the ATG of *CDR1* considered as +1). The full  
634 *CDR1* promoter, which was used in the complementing plasmid, contained the -1 to -  
635 1504 region. The *PDR1* promoter contained the -1 to -847 region in all constructs.  
636 *ERG1* promoter region consisted of the -1 to -916 region and the *FKS1* promoter  
637 contained the -1 to -1795 region. SRE mutations in the target gene promoters were

638 done by modifying the SRE core sequence and 2 adjacent bases into a PaeI restriction  
639 enzyme sequence with Gibson assembly in which the overlapping primers contained  
640 the PaeI sequence. All constructs were verified by Sanger sequencing (University of  
641 Iowa Genomic Core)

642

643 **C. glabrata transformation.** Cell transformations were performed using a lithium  
644 acetate method (43). After being heat shocked, cells were either directly plated onto  
645 selective CSM agar plates (for auxotrophic complementation) or grown at 30°C at 200  
646 rpm overnight (for nourseothricin selection). Overnight cultures were then plated on  
647 YPD or CSM agar plates supplemented with 50 µg/ml of nourseothricin. Plates were  
648 incubated at 30°C for 24 to 48 h before individual colonies were isolated and screened  
649 by PCR for correct insertion of the targeted construct.

650

651 **Expression and purification of Upc2A DNA binding domain.** The DNA sequence  
652 corresponding to the first 150 amino acids of the N-terminus of Upc2A was amplified by  
653 PCR and cloned into pET28a+ vector [digested with NcoI and SacI] with Gibson cloning.  
654 Correct clones were sequenced verified and transformed into the BL21 DE3 *E. coli*  
655 expression strain (Thermo Fisher, Waltham, MA). Mid-log phase cells were induced with  
656 1 mM IPTG (Fisher Scientific, Hampton, NH) for 4 hours at 30°C. Collected cells were  
657 lysed using a French Press G-M high pressure disruptor (GlenMills, Clifton, NJ). The  
658 clarified lysate was subjected to Talon Metal Affinity column (Takara, Mountain View,  
659 CA) as per the manufacturer's protocol. Purified protein was dialyzed with dialysis buffer

660 [20 mM Tris pH 8.0, 500 mM NaCl, 1 mM dithiothreitol and 0.5% Tween 20] for 24 hours  
661 and its concentration was quantified by Bradford assay (Bio-Rad, Des Plaines, IL).

662

663 **Quantification of transcript levels by RT-qPCR.** Total RNA was extracted from cells  
664 by extraction using TRIzol (Invitrogen, Carlsbad, CA) and chloroform (Fisher Scientific,  
665 Hampton, NH) followed by purification with RNeasy minicolumns (Qiagen, Redwood  
666 City, CA). RNA was reverse-transcribed using an iScript cDNA synthesis kit (Bio-Rad,  
667 Des Plaines, IL). Assay of RNA via quantitative PCR [qPCR] was performed with iTaq  
668 universal SYBR green supermix (Bio-Rad). Target gene transcript levels were  
669 normalized to transcript levels of 18S rRNA during fluconazole challenge and  $\beta$ -tubulin  
670 mRNA in other conditions. Primer sequences were listed in supplementary table 4.

671

672 **Spot test assay.** Cells were grown in YPD medium to mid-log-phase. Cultures were  
673 then 10-fold serially diluted and spotted onto YPD agar plates containing different  
674 concentrations [10 or 20  $\mu$ g/ml] of fluconazole (LKT laboratories, St Paul, MN),  
675 caspofungin 100 ng/ml (Apexbio, Houston, TX), congo red 100  $\mu$ g/ml (Sigma-Aldrich,  
676 St. Louis, MO), caffeine (Sigma-Aldrich). In some experiments, the YPD medium and  
677 agar was supplemented with 50  $\mu$ g/ml nourseothricin to maintain plasmids derived from  
678 the pBV133 vector (26). All agar plates were incubated at 30°C for 24 to 48 h before  
679 imaging was performed. To adjust the pH level, 100 mM of MES (VWR, Radnor, PA)  
680 [pH 5.5], HEPES (RPI) [pH 7.0], and TAPS (Sigma-Aldrich) [pH 8.0] were added to the  
681 2x YPD. Solutions were then filtered and mixed with autoclaved 3% agar to make YPD  
682 agar plates.

683

684 **Competitive growth assay.** The *LEU2* coding region along with its immediate 500 bps  
685 upstream and downstream sequences were amplified from CBS138 genomic DNA. The  
686 product was then used to restore *LEU2* in mSRE *PDR1*/mSRE *CDR1* [KKY2001  
687 background] and *pdr1Δ/cdr1Δ* at its native locus to generate mSRE *PDR1*/mSRE  
688 *CDR1/LEU2* and *pdr1Δ/cdr1Δ/LEU2*. In the fluconazole competitive growth assay, mid-  
689 log growth culture [between OD of 1 and 2] was diluted to 0.5 O.D. in fresh YPD. 1:1  
690 ratio of *PDR1 CDR1* and mSRE *PDR1*/mSRE *CDR1* cultures were mixed together, and  
691 treated either with fluconazole [20 µg/ml] or ethanol. At each time point, culture was  
692 collected, serially diluted, and plated on YPD and synthetic complete media without  
693 leucine for CFU determination.

694

695 In the anaerobic growth competitive assay, KKY2001 and its isogenic *pdr1Δ cdr1Δ*  
696 derivative were diluted to 0.01 O.D. and the mixed culture [1:1 ratio] was grown either  
697 aerobically [normoxic] or anaerobically [in a GasPak chamber (BD Biosciences, San  
698 Jose, CA)] for 24 hours. 1 mM Acetyl CoA (Sigma-Aldrich), 1% Tween80/Ethanol [1:1  
699 ratio], 1 mM Squalene (VWR), 50 µM Lanosterol (Sigma-Aldrich), 50 µM Ergosterol  
700 (Sigma-Aldrich) were added to the mixed culture before the incubation. Acetyl CoA  
701 stock solution was made in sterile H<sub>2</sub>O, and all sterol stock solutions were made in  
702 Tween80/Ethanol (1:1 ratio).

703

704 **Electrophoretic mobility shift assays (EMSA).** DNA probes were amplified by PCR  
705 with biotinylated primers (IDT, Coralville, IA) corresponding to the sequences listed in

706 S2 table. Fragments from the *ERG1* promoter -704 to -916, *CDR1* promoter -560 to -  
707 731, *PDR1* promoter -552 to -728, *FKS1* promoter -1489 to -1666, and *HO* promoter -  
708 787 to -957 regions were amplified. Reaction buffer [18  $\mu$ l], containing 5  $\mu$ g sheared  
709 salmon sperm DNA (Thermo Fisher Scientific, Waltham, MA), 5% Glycerol, 0.01%  
710 NP40, 0.1% bovine serum albumin (Thermo Fisher Scientific), and 2  $\mu$ l of 10x binding  
711 buffer [100 mM Tris pH 7.5, 400 mM NaCl, 10 mM DTT and 100  $\mu$ M ZnSO<sub>4</sub>], was  
712 incubated with different concentrations of Upc2A-6X His or 1X binding buffer for 10  
713 minutes at room temperature. Biotinylated probes [20 fmol] were added in a final  
714 reaction volume of 20  $\mu$ l and incubated for additional 20 min at room temperature.  
715 Samples were immediately subjected to electrophoresis on 5% polyacrylamide  
716 Tris/Borate/EDTA [TBE] gel in 0.5x TBE running buffer at 4°C. Subsequently, samples  
717 were transferred into a nylon membrane (GE, Chicago, IL) in 0.5X TBE buffer at 4°C.  
718 Samples were then crosslinked on nylon membrane under UV light for 10 min.  
719 Membrane was blocked with Intercept blocking buffer (LI-COR Biosciences, Lincoln,  
720 NE) containing 1% SDS for 30 min before IRDye 680LT Streptavidin (LI-COR  
721 Biosciences) antibody was added at 1:20000 final dilution. After 35 min of incubation,  
722 the membrane was washed three times with phosphate buffer saline [PBS] containing  
723 0.1% tween (RPI). Imaging was performed with Odyssey CLx Imaging System (LI-COR  
724 Biosciences) and analyzed by Image Studio Lite Software (LI-COR Biosciences).

725

726 **Chromatin immunoprecipitation-Next Generation Sequencing.** Overnight cultures  
727 were inoculated at 0.1 OD/ml in fresh YPD and allowed to grow to 0.4-0.5 OD/ml. Cells  
728 were treated with Fluconazole 20  $\mu$ g/ml or ethanol for 2 hours. Cells were fixed with 1%



729 formaldehyde (Sigma-Aldrich) for 15 min at room temperature with mild shaking [120-  
730 150 rpm]. The fixing reaction was stopped with 250 mM glycine (RPI) for 15 min at room  
731 temperature with mild shaking [120-150 rpm]. Cells were centrifuged and washed once  
732 with PBS. The cell pellet was resuspended in lysis buffer [50mM Hepes pH 7.5, 140mM  
733 NaCl, 1mM EDTA, 1% Triton X-100, 0.1% Sodium deoxycholate, 1mM PMSF, 1x  
734 protease inhibitor cocktail (Roche Applied Science, Penzberg, Germany). Cells were  
735 then lysed with 1 ml glass beads (Scientific Industries Inc, Bohemia, NY) at 4°C for 10  
736 min. Both cell lysate and debris were collected and subsequently transferred to an AFA  
737 fiber pre-slit snap-cap [6 x 15mm] microtube (Covaris, Woburn, MA) for additional  
738 cellular lysis and DNA shearing.

739

740 Genomic DNA was sheared with E220 focused-ultrasonicator (Covaris) [peak incident  
741 power: 75 W, duty factor: 10%, cycles per burst: 200, treatment time: 16 min,  
742 temperature: 10°C max, sample volume: 130 µl.] The sheared sample was centrifuged  
743 and the clear lysate was collected. Upc2A was immunoprecipitated with Dyna beads-  
744 protein G magnetic beads (Invitrogen, Carlsbad, CA) and anti-HA antibody (Invitrogen)  
745 [1:50 dilution] overnight at 4°C. Beads were then washed twice with lysis buffer, once  
746 with lysis buffer+ 500mM NaCl, once with LiCl buffer [10 mM Tris pH 8, 250 mM LiCl,  
747 0.5% P-40, 0.5% Sodiumdeoxycholate, and 1 mM EDTA], and once with Tris-EDTA  
748 buffer. Beads were resuspended in TE and treated with RNase A (Thermo Fisher  
749 Scientific) at 37°C for 30 min. Beads were then washed once with Tris-EDTA buffer,  
750 resuspended in Tris-EDTA buffer with 1% SDS, and incubate at 65°C for at least 5  
751 hours to reverse crosslink. Eluted DNA was subsequently purified with mini elite clean-

752 up kit (Qiagen). Qubit fluorometric assay (Thermo Fisher Scientific) was used to analyze  
753 the yield quantity and Agilent Bioanalyzer (Agilent Technology, Santa Clara, CA) was  
754 used to determine the average sheared DNA size.

755

756 All ChIPed DNA libraries were generated with Accel-NGS plus DNA library kit (Swift  
757 Biosciences, Ann Arbor, MI) according to the manufacturer's instructions. Samples  
758 were sequenced at the University of Iowa Institute for Human Genetics Genomics  
759 Division using an Illumina NovaSeq 6000 instrument. Read quality was confirmed using  
760 FastQC (Babraham Bioinformatics). The reads from duplicate experiments were  
761 combined and mapped to the *C. glabrata* CBS138 genome using HISAT2 (44). Paired  
762 reads with intervening fragments greater than 1000 bp were removed during the  
763 mapping. The total number of mapped reads were reduced by randomly selecting 2.5%  
764 from each bam file which were then sorted and indexed using Samtools. ChiP-seq  
765 peak calling was done with the callpeak function of MACS2 using a false discovery rate  
766 (q-value) cutoff of 0.001 and a maximum allowable gap between peaks of 100 bp (28).  
767 Differential peak detection among the experimental conditions was done using the  
768 bdgdiff function of MACS2. The default likelihood ratio cutoff of 1000 was used. Output  
769 files from both callpeak and bdgdiff were annotated to identify candidate downstream  
770 genes using the ChIPpeakAnno R package (45).

771

772 **RNA-sequencing.** A single colony of each *C. glabrata* strain was used to inoculate 2  
773 ml of YPD, which was grown overnight at 30° C in an environmental shaking incubator.  
774 Cell density was then adjusted to OD<sub>600</sub>=0.1 in 10 ml YPD, and cultures were grown as

775 before for 6 hrs (mid-log phase). For the fluconazole-treated strains, either fluconazole  
776 (50  $\mu$ g/ml final concentration) or DMSO (diluent control) was added to the 10 ml culture  
777 and grown for 6 hrs. Cells were collected by centrifugation, supernatants discarded,  
778 and cell pellets stored at -80° C. RNA was isolated from cell pellets via a hot phenol  
779 method as described previously (46) . The quantity and purity of RNA were determined  
780 by spectrophotometer (NanoDrop Technologies, Inc., Wilmington, DE) and verified  
781 using a Bioanalyzer 2100 (Agilent Technologies, Santa Clara, CA). Library preparation  
782 and RNA sequencing analysis were performed as previously described (47). Transcript  
783 quantification of expression levels and analysis of differential expression were done  
784 using HISAT2 and Stringtie (48). Differential expression was analyzed using DESeq2  
785 (49).

786

787 **DNase I protection assay.** DNA probes were generated by PCR. To generate a 5' [ $\gamma$ -  
788  $^{32}$ P] singly end-labelled probe one of the PCR primers was modified [5 Amino-MC6  
789 (Integrated DNA technologies, Coralville,IA)] at the 5' end to prevent phosphorylation by  
790 polynucleotide kinase. Probes were end-labelled [1 pmol] using 10  $\mu$ Ci of [ $\gamma$ - $^{32}$ P]-ATP  
791 (PerkinElmer, Waltham, MA) and 10 U polynucleotide kinase (New England Biolabs,  
792 Beverly, MA) as instructed by the manufacturer. Unincorporated [ $\gamma$ - $^{32}$ P]-ATP was  
793 removed using a nucleotide removal column (Qiagen). The binding reaction was done  
794 as described in the EMSA section, and the sample was digested with DNase I (NEB  
795 [1:20 dilution]) for 30 seconds at room temperature. DNase I foot-printing and DNA  
796 sequencing reactions were performed as previously described (50).

797

798  **$\beta$ -galactosidase assay.** Harvested cells were lysed with glass beads (Scientific  
799 Industries Inc) in breaking buffer [100 mM Tris pH8, 1 mM Dithiothreitol, and 20%  
800 Glycerol] at 4°C for 10 min. Lysate was collected and  $\beta$ -galactosidase reactions carried  
801 out in Z-buffer [60 mM Na<sub>2</sub>HPO<sub>4</sub>, 40 mM NaH<sub>2</sub>PO<sub>4</sub>, 10 mM KCl, 1 mM MgSO<sub>4</sub>, 50 mM  
802 2-Mercaptoethanol] with 650  $\mu$ g /ml O-nitrophenyl- $\beta$ -D-galactoside [ONPG]. Miller units  
803 were calculated based on the equation:  $[\text{OD}_{420} \times 1.7] / [0.0045 \times \text{total protein}$   
804  $\text{concentration} \times \text{used extract volume} \times \text{time}]$ . The Bradford assay (Bio-Rad) was used to  
805 measure the total protein concentration in the lysate.

806  
807 **Western immunoblot.** Cells were lysed with lysis buffer [1.85 M NaOH, 7.5% 2-  
808 Mercaptoethanol]. Proteins were precipitated with 50% Trichloroacetic acid and  
809 resuspended in Urea buffer [40 mM Tris pH8, 8.0 M Urea, 5% SDS, 1% 2-  
810 Mercaptoethanol]. Cdr1, Pdr1, and Upc2A rabbit polyclonal antibodies were previously  
811 described (18, 27). Mouse anti-HA monoclonal antibody was purchased from Invitrogen.  
812 Secondary antibodies were purchased from LI-COR Biosciences. Imaging was  
813 performed with Odyssey CLx Imaging System (LI-COR Biosciences) and analyzed by  
814 Image Studio Lite Software (LI-COR Biosciences). Detected target band fluorescence  
815 intensity was normalized against tubulin fluorescence intensity and compiled from 2  
816 biological replicate experiments and 2 technical replicates in each experiment, giving 4  
817 replicates in total.

818  
819 **Statistical analysis.** Unpaired T-test was used to compare between isogenic deletion  
820 mutant and wildtype strains. Paired T-test was used to compare between the drug

821 treated and non-treated conditions. \*, \*\*, \*\*\* were designated for  $P \leq 0.05$ , 0.01, 0.001  
822 respectively.

823

824 Acknowledgements

825 We thank Dr. Damian Krysan for helpful discussions.

826

827 References

- 828 1. Denning DW, Bromley MJ. Infectious Disease. How to bolster the antifungal  
829 pipeline. *Science*. 2015;347(6229):1414-6.
- 830 2. Arastehfar A, Gabaldon T, Garcia-Rubio R, Jenks JD, Hoenigl M, Salzer HJF, et  
831 al. Drug-Resistant Fungi: An Emerging Challenge Threatening Our Limited Antifungal  
832 Armamentarium. *Antibiotics (Basel)*. 2020;9(12).
- 833 3. Lass-Flörl C. Triazole antifungal agents in invasive fungal infections: a  
834 comparative review. *Drugs*. 2011;71(18):2405-19.
- 835 4. Perfect JR, Ghannoum M. Emerging Issues in Antifungal Resistance. *Infect Dis*  
836 *Clin North Am*. 2020;34(4):921-43.
- 837 5. Pfaller MA, Diekema DJ, Turnidge JD, Castanheira M, Jones RN. Twenty Years  
838 of the SENTRY Antifungal Surveillance Program: Results for Candida Species From  
839 1997-2016. *Open Forum Infect Dis*. 2019;6(Suppl 1):S79-S94.
- 840 6. Arendrup MC, Patterson TF. Multidrug-Resistant Candida: Epidemiology,  
841 Molecular Mechanisms, and Treatment. *J Infect Dis*. 2017;216(suppl\_3):S445-S51.
- 842 7. Vermitsky JP, Edlind TD. Azole resistance in *Candida glabrata*: coordinate  
843 upregulation of multidrug transporters and evidence for a Pdr1-like transcription factor.  
844 *Antimicrob Agents Chemother*. 2004;48(10):3773-81.
- 845 8. Tsai HF, Krol AA, Sarti KE, Bennett JE. *Candida glabrata* PDR1, a transcriptional  
846 regulator of a pleiotropic drug resistance network, mediates azole resistance in clinical  
847 isolates and petite mutants. *Antimicrob Agents Chemother*. 2006;50(4):1384-92.
- 848 9. Whaley SG, Rogers PD. Azole Resistance in *Candida glabrata*. *Current*  
849 *infectious disease reports*. 2016;18(12):41.
- 850 10. Sanglard D, Ischer F, Calabrese D, Majcherczyk PA, Bille J. The ATP binding  
851 cassette transporter gene CgCDR1 from *Candida glabrata* is involved in the resistance  
852 of clinical isolates to azole antifungal agents. *Antimicrob Agents Chemother*.  
853 1999;43(11):2753-65.
- 854 11. Paul S, Moye-Rowley WS. Multidrug resistance in fungi: regulation of transporter-  
855 encoding gene expression. *Frontiers in physiology*. 2014;5:143.
- 856 12. Siopi M, Tarpatzi A, Kalogeropoulou E, Damianidou S, Vasilakopoulou A, Vourli  
857 S, et al. Epidemiological Trends of Fungemia in Greece with a Focus on Candidemia  
858 during the Recent Financial Crisis: a 10-Year Survey in a Tertiary Care Academic  
859 Hospital and Review of Literature. *Antimicrob Agents Chemother*. 2020;64(3).

- 860 13. Coste AT, Karababa M, Ischer F, Bille J, Sanglard D. TAC1, transcriptional  
861 activator of CDR genes, is a new transcription factor involved in the regulation of  
862 *Candida albicans* ABC transporters CDR1 and CDR2. *Eukaryot Cell*. 2004;3(6):1639-  
863 52.
- 864 14. Morschhauser J, Barker KS, Liu TT, Blab-Warmuth J, Homayouni R, Rogers PD.  
865 The transcription factor Mrr1p controls expression of the MDR1 efflux pump and  
866 mediates multidrug resistance in *Candida albicans*. *PLoS Pathog*. 2007;3:e164.
- 867 15. Perea S, Lopez-Ribot JL, Kirkpatrick WR, McAtee RK, Santillan RA, Martinez M,  
868 et al. Prevalence of molecular mechanisms of resistance to azole antifungal agents in  
869 *Candida albicans* strains displaying high-level fluconazole resistance isolated from  
870 human immunodeficiency virus-infected patients. *Antimicrob Agents Chemother*.  
871 2001;45(10):2676-84.
- 872 16. Flowers SA, Barker KS, Berkow EL, Toner G, Chadwick SG, Gyax SE, et al.  
873 Gain-of-function mutations in UPC2 are a frequent cause of ERG11 upregulation in  
874 azole-resistant clinical isolates of *Candida albicans*. *Eukaryot Cell*. 2012;11(10):1289-  
875 99.
- 876 17. Whaley SG, Caudle KE, Vermitsky JP, Chadwick SG, Toner G, Barker KS, et al.  
877 UPC2A is required for high-level azole antifungal resistance in *Candida glabrata*.  
878 *Antimicrob Agents Chemother*. 2014;58(8):4543-54.
- 879 18. Vu BG, Thomas GH, Moyer-Rowley WS. Evidence that Ergosterol Biosynthesis  
880 Modulates Activity of the Pdr1 Transcription Factor in *Candida glabrata*. *MBio*.  
881 2019;10(3).
- 882 19. Crowley JH, Leak FW, Jr., Shianna KV, Tove S, Parks LW. A mutation in a  
883 purported regulatory gene affects control of sterol uptake in *Saccharomyces cerevisiae*.  
884 *J Bacteriol*. 1998;180(16):4177-83.
- 885 20. McCormack PL, Perry CM. Caspofungin: a review of its use in the treatment of  
886 fungal infections. *Drugs*. 2005;65(14):2049-68.
- 887 21. Healey KR, Perlin DS. Fungal Resistance to Echinocandins and the MDR  
888 Phenomenon in *Candida glabrata*. *J Fungi (Basel)*. 2018;4(3).
- 889 22. Yang H, Tong J, Lee CW, Ha S, Eom SH, Im YJ. Structural mechanism of  
890 ergosterol regulation by fungal sterol transcription factor Upc2. *Nat Commun*.  
891 2015;6:6129.
- 892 23. Heilmann CJ, Schneider S, Barker KS, Rogers PD, Morschhauser J. An A643T  
893 mutation in the transcription factor Upc2p causes constitutive ERG11 upregulation and  
894 increased fluconazole resistance in *Candida albicans*. *Antimicrob Agents Chemother*.  
895 2010;54(1):353-9.
- 896 24. Hoot SJ, Smith AR, Brown RP, White TC. An A643V amino acid substitution in  
897 Upc2p contributes to azole resistance in well-characterized clinical isolates of *Candida*  
898 *albicans*. *Antimicrob Agents Chemother*. 2011;55(2):940-2.
- 899 25. Davies BS, Wang HS, Rine J. Dual activators of the sterol biosynthetic pathway  
900 of *Saccharomyces cerevisiae*: similar activation/regulatory domains but different  
901 response mechanisms. *Mol Cell Biol*. 2005;25(16):7375-85.
- 902 26. Vu BG, Moyer-Rowley WS. Construction and Use of a Recyclable Marker To  
903 Examine the Role of Major Facilitator Superfamily Protein Members in *Candida glabrata*  
904 Drug Resistance Phenotypes. *mSphere*. 2018;3(2).

- 905 27. Paul S, Bair TB, Moye-Rowley WS. Identification of Genomic Binding Sites for  
906 *Candida glabrata* Pdr1 Transcription Factor in Wild-Type and rho0 Cells. *Antimicrob*  
907 *Agents Chemother.* 2014;58(11):6904-12.
- 908 28. Zhang Y, Liu T, Meyer CA, Eeckhoutte J, Johnson DS, Bernstein BE, et al.  
909 Model-based analysis of ChIP-Seq (MACS). *Genome Biol.* 2008;9(9):R137.
- 910 29. Gallo-Ebert C, Donigan M, Stroke IL, Swanson RN, Manners MT, Francisco J, et  
911 al. Novel antifungal drug discovery based on targeting pathways regulating the fungus-  
912 conserved Upc2 transcription factor. *Antimicrob Agents Chemother.* 2014;58(1):258-66.
- 913 30. Vik A, Rine J. Upc2p and Ecm22p, dual regulators of sterol biosynthesis in  
914 *Saccharomyces cerevisiae*. *Mol Cell Biol.* 2001;21(19):6395-405.
- 915 31. Paul S, Schmidt JA, Moye-Rowley WS. Regulation of the CgPdr1 transcription  
916 factor from the pathogen *Candida glabrata*. *Eukaryot Cell.* 2011;10(2):187-97.
- 917 32. Jorda T, Puig S. Regulation of Ergosterol Biosynthesis in *Saccharomyces*  
918 *cerevisiae*. *Genes (Basel).* 2020;11(7).
- 919 33. Li QQ, Tsai HF, Mandal A, Walker BA, Noble JA, Fukuda Y, et al. Sterol uptake  
920 and sterol biosynthesis act coordinately to mediate antifungal resistance in *Candida*  
921 *glabrata* under azole and hypoxic stress. *Mol Med Rep.* 2018;17(5):6585-97.
- 922 34. Kwast KE, Lai LC, Menda N, James DT, 3rd, Aref S, Burke PV. Genomic  
923 analyses of anaerobically induced genes in *Saccharomyces cerevisiae*: functional roles  
924 of Rox1 and other factors in mediating the anoxic response. *J Bacteriol.*  
925 2002;184(1):250-65.
- 926 35. Fuchs BB, Mylonakis E. Our paths might cross: the role of the fungal cell wall  
927 integrity pathway in stress response and cross talk with other stress response  
928 pathways. *Eukaryot Cell.* 2009;8(11):1616-25.
- 929 36. Katiyar SK, Alastruey-Izquierdo A, Healey KR, Johnson ME, Perlin DS, Edlind  
930 TD. Fks1 and Fks2 are functionally redundant but differentially regulated in *Candida*  
931 *glabrata*: implications for echinocandin resistance. *Antimicrob Agents Chemother.*  
932 2012;56(12):6304-9.
- 933 37. Espenshade PJ, Hughes AL. Regulation of sterol synthesis in eukaryotes. *Annu*  
934 *Rev Genet.* 2007;41:401-27.
- 935 38. Silver PM, Oliver BG, White TC. Role of *Candida albicans* transcription factor  
936 Upc2p in drug resistance and sterol metabolism. *Eukaryot Cell.* 2004;3(6):1391-7.
- 937 39. MacPherson S, Akache B, Weber S, De Deken X, Raymond M, Turcotte B.  
938 *Candida albicans* zinc cluster protein Upc2p confers resistance to antifungal drugs and  
939 is an activator of ergosterol biosynthetic genes. *Antimicrob Agents Chemother.*  
940 2005;49(5):1745-52.
- 941 40. Znaidi S, Weber S, Al-Abdin OZ, Bomme P, Saidane S, Drouin s, et al.  
942 Genomewide location analysis of *Candida albicans* Upc2p, a regulator of sterol  
943 metabolism and azole drug resistance. *Eukaryot Cell.* 2008;7:836-47.
- 944 41. Nagi M, Nakayama H, Tanabe K, Bard M, Aoyama T, Okano M, et al.  
945 Transcription factors CgUPC2A and CgUPC2B regulate ergosterol biosynthetic genes  
946 in *Candida glabrata*. *Genes Cells.* 2011;16(1):80-9.
- 947 42. Khakhina S, Simonicova L, Moye-Rowley WS. Positive autoregulation and  
948 repression of transactivation are key regulatory features of the *Candida glabrata* Pdr1  
949 transcription factor. *Mol Microbiol.* 2018;107(6):747-64.

- 950 43. Ito H, Fukuda Y, Murata K, Kimura A. Transformation of intact yeast cells treated  
951 with alkali cations. *J Bacteriol.* 1983;153:163-8.
- 952 44. Kim D, Paggi JM, Park C, Bennett C, Salzberg SL. Graph-based genome  
953 alignment and genotyping with HISAT2 and HISAT-genotype. *Nat Biotechnol.*  
954 2019;37(8):907-15.
- 955 45. Zhu LJ, Gazin C, Lawson ND, Pages H, Lin SM, Lapointe DS, et al.  
956 ChIPpeakAnno: a Bioconductor package to annotate ChIP-seq and ChIP-chip data.  
957 *BMC bioinformatics.* 2010;11:237.
- 958 46. Schmitt ME, Brown TA, Trumppower BL. A simple and rapid method for  
959 preparation of RNA from *S. cerevisiae*. *Nucl Acids Res.* 1990;18:3091-2.
- 960 47. Whaley SG, Caudle KE, Simoncova L, Zhang Q, Moye-Rowley WS, Rogers PD.  
961 Jjj1 Is a Negative Regulator of Pdr1-Mediated Fluconazole Resistance in *Candida*  
962 *glabrata*. *mSphere.* 2018;3(1).
- 963 48. Pertea M, Kim D, Pertea GM, Leek JT, Salzberg SL. Transcript-level expression  
964 analysis of RNA-seq experiments with HISAT, StringTie and Ballgown. *Nat Protoc.*  
965 2016;11(9):1650-67.
- 966 49. Love MI, Huber W, Anders S. Moderated estimation of fold change and  
967 dispersion for RNA-seq data with DESeq2. *Genome Biol.* 2014;15(12):550.
- 968 50. Paul S, Stamnes M, Thomas GH, Liu H, Hagiwara D, Gomi K, et al. AtrR Is an  
969 Essential Determinant of Azole Resistance in *Aspergillus fumigatus*. *MBio.* 2019;10(2).
- 970

971 Figure Legends

972

973 Figure 1. **Characterization of *UPC2A* gain-of-function allele.** A. An isogenic series  
974 of strains was prepared that varied in their *UPC2A* allele: wild-type (CBS138), *upc2A* $\Delta$ ,  
975 or strains containing an amino-terminally HA-tagged form of wild-type (3X HA-*UPC2A*)  
976 or the G898D form of *UPC2A* (3X HA-G898D *UPC2A*). These strains were grown to  
977 mid-log phase and then tested for their resistance to the indicated levels of fluconazole  
978 in rich medium. B. G898D Upc2A induced *ERG11* mRNA under basal conditions. The  
979 strains described in A were grown in the presence or absence of fluconazole and total  
980 RNA prepared. Levels of mRNA were assessed by RT-qPCR. C. Western blot  
981 analysis of Upc2A and target gene-encoded proteins. The indicated strains were grown  
982 as described previously in the presence or absence of fluconazole, whole cell protein



983 extracts prepared and analyzed by western blotting using the antisera listed at the left  
984 side. Upc2A was detected using either an anti-Upc2A polyclonal antibody ( $\alpha$ -Upc2A) or  
985 anti-HA ( $\alpha$ -HA). Tubulin was used as a loading control along with Ponceau S staining of  
986 the membranes. Quantitation shown in the right hand panel was performed as  
987 described in Materials and Methods.

988

989 **Figure 2. Chromatin immunoprecipitation-high throughput sequencing (ChIP-seq)**

990 **analysis of *UPC2A*.** A. 3X HA-tagged forms of either the wild-type (WT) or G898D  
991 (M)alleles of *UPC2A* were used for a standard ChIP-seq experiment. Strains were in  
992 the presence (WTF, MF) or absence (WT, M) of fluconazole, followed by ChIP-seq  
993 analysis as described earlier (27). A Venn diagram showing the overlap of genes  
994 detected in each sample is shown with largest number of genes color-coded from dark  
995 to light. B. MEME-ChIP analysis of sterol response element (SREs) shared in Upc2A  
996 peaks. A logo is shown representing the most commonly enriched element associated  
997 with Upc2A ChIP-seq peaks that was detected by MEME-ChIP analysis. AR1b and  
998 AR1c show the corresponding Upc2 consensus sites from *Saccharomyces cerevisiae*  
999 (29). C. Venn diagram showing the overlap between binding sites found for  
1000 fluconazole-stressed 3X HA-*UPC2A* (WTF) and  $\rho^0$ -induced wild-type Pdr1 (27). D.  
1001 Comparison of Upc2A- and Pdr1-binding to the *CDR1* and *ERG11* promoters. Plots of  
1002 relative ChIP-seq density are shown for ChIP reactions performed with either anti-Pdr1  
1003 or  $\alpha$ -HA to detect epitope-tagged Upc2A. ChIP in samples treated with fluconazole is  
1004 denoted +F while the corresponding no drug control is represented by -F. The bottom

1005 line is a control ChIP reaction using wild-type cells that lack the HA-epitope tag  
1006 (Upc2A). *CDR1* is controlled by both factors while *ERG11* only responds to Upc2A.

1007

1008 **Figure 3. RNA-seq analysis of fluconazole induced genes in wild-type and**  
1009 ***upc2AΔ* strains.** A. Venn diagrams illustrating the union of genes that are at least two-  
1010 fold induced in wild-type (2X Induced WTF) or isogenic *upc2AΔ* cells treated with  
1011 fluconazole along with genes containing a Upc2A SRE that exhibits fluconazole  
1012 inducible binding compared to untreated samples (WTF over WT). B. Heat map of  
1013 representative fluconazole induced genes is shown. The values refer to the log<sub>2</sub> score  
1014 of the ratio of RPKM of fluconazole treated over untreated samples. The scale for the  
1015 heat map is indicated at the bottom and the presence of a SRE is denoted by the solid  
1016 dot in the lefthand column.

1017

1018 **Figure 4. DNA-binding of Upc2A to SREs in target genes.** A. Locations of SREs  
1019 from several different promoters are shown. *ERG1*, *CDR1*, *PDR1* and *FKS1* all  
1020 correspond to the *C. glabrata* locus while Sc*ERG2* is from *S. cerevisiae* and Ca*ERG2* is  
1021 from *C. albicans*. Note that *ERG1* contains an everted SRE repeat indicated by the  
1022 arrows. The single SRE is shown in black and white. The extent of DNA protected from  
1023 cleavage by the DNase I mapping experiment (see below) is shown in gray. B. DNase  
1024 I protection of the indicated *C. glabrata* promoters is shown. The position of each SRE  
1025 is indicated by the bar at the righthand side and DNase I hypersensitive sites are noted  
1026 by the arrows. AG refers to the purine-specific reaction of Maxam-Gilbert chemical  
1027 sequencing and is carried out on the same radioactive DNA fragment used in the

1028 DNase I reaction. Recombinant Upc2A was added (+) to the DNA probe or omitted (-)  
1029 as indicated. C. Electrophoretic mobility shift assay (EMSA) analysis of Upc2A binding  
1030 to wild-type and mutant SREs. Biotinylated probes were prepared from the indicated C.  
1031 glabrata promoter regions containing either wild-type (wt) or mutant (mut) versions of  
1032 each SRE. Sequences of these different SREs are shown at the bottom of the panel  
1033 with the altered residues in lower case. The SRE repeats in the *ERG1* promoter are  
1034 shown by the divergent arrows at the top of the sequence. Position of the shifted  
1035 protein:DNA complexes are shown by the arrows at the lefthand side of each image.  
1036 The presence or absence of Upc2A protein is indicated by the (+) or (-), respectively.  
1037

1038 **Figure 5. Phenotypes of SRE mutations.** A. Normal expression of *lacZ* gene fusions  
1039 requires the presence of intact SREs in Upc2A target promoters. Low-copy-number  
1040 plasmids containing translational fusions between *ERG1*, *CDR1* and *PDR1* 5' regulatory  
1041 region and *E. coli lacZ* were generated containing either the wild-type version of each  
1042 promoter or the same fragment with the SRE mutant (mSRE) shown to reduce in vitro  
1043 binding in Figure 4. These plasmids were introduced into wild-type cells, grown in the  
1044 absence or presence of fluconazole and then  $\beta$ -galactosidase activity determined. B.  
1045 Western blot analysis of *CDR1* and *PDR1* expression upon loss of the wild-type SRE.  
1046 All alleles of *PDR1* were integrated into the chromosome while all alleles of *CDR1* were  
1047 carried on a low-copy-number plasmid. The presence of either the wild-type (wt) or  
1048 mutant (m) SRE at each gene is indicated at the bottom of the panel. Each strain was  
1049 grown in the presence or absence of fluconazole and levels of proteins of interest  
1050 determined using western blotting with appropriate antibodies as described above.

1051 Erg11 was detected using an anti-peptide antiserum. The right hand panel shows the  
1052 quantitation as described in Figure 1. C. The strains described above were tested by  
1053 serial dilution for their growth on rich medium (YPD) or the same medium containing  
1054 fluconazole (FLC).  
1055  
1056 **Figure 6. Role for *CDR1* and *PDR1* in anaerobic growth.** A. Wild-type cells were  
1057 grown under aerobic or anaerobic conditions and total RNA prepared. Levels of the  
1058 mRNA corresponding to the indicated genes were determined using RT-qPCR. B.  
1059 Western blot analysis of the indicated proteins was performed using appropriate  
1060 antisera described earlier. Whole cell protein extracts were prepared after growth in the  
1061 presence of oxygen (aerobic) or its absence (anaerobic). Quantitation is shown in the  
1062 right hand panel. C. Expression of *CDR1* and *PDR1* in response to aerobic versus  
1063 anaerobic growth was assessed by western blotting. Strains containing these genes  
1064 under control of their wild-type promoter regions or an isogenic strain with both SREs  
1065 removed from these promoters were used to prepare whole cell protein extracts.  
1066 Quantitation of at least three western blot experiments is shown on the righthand side of  
1067 the panel. D. Competitive growth assay between wild-type and *cdr1Δ pdr1Δ* double  
1068 mutant strains was performed. These two strains were mixed at a starting proportion of  
1069 50:50 and then grown in rich medium under aerobic or anaerobic conditions. After  
1070 growth, the final proportion was determined by plating cells and counting the number of  
1071 leucine prototrophic colonies (specific for *cdr1Δ pdr1Δ* cells containing *LEU2*).  
1072

1073 **Figure 7. Upc2A transcriptionally regulates FKS1 expression.** A. An isogenic  
1074 series of strains with the listed *UPC2A* genotypes was tested for resistance to the  
1075 indicated stress agents that affect the cell wall. Strains were grown to mid-log phase  
1076 and then serially diluted across each plate. B. Strains containing the different alleles of  
1077 *UPC2A* were grown and analyzed for levels of the indicated RNAs using RT-qPCR. C.  
1078 Isogenic wild-type and *upc2A*Δ strains were grown in the presence or absence of  
1079 caspofungin and levels of *FKS1* and *FKS2* RNA assayed as above. D. A probe from  
1080 the *FKS1* promoter containing the putative SRE shown in Figure 4A was used in a  
1081 EMSA experiment. A version of this probe lacking the SRE (mSRE) was also compared  
1082 for its behavior in this assay. Upc2A was either omitted (-) or added (+) to the reaction  
1083 prior to electrophoresis. E. An *FKS1-lacZ* fusion gene containing either the wild-type or  
1084 the mSRE version of the promoter was introduced into wild-type cells. Levels of *FKS1*-  
1085 dependent β-galactosidase were determined in the presence or absence of  
1086 caspofungin.

1087

1088 Tables

1089

| Name    | Parent strain | Genotype                                           |
|---------|---------------|----------------------------------------------------|
| KKY2001 | CBS138        | <i>his3Δ::FRT leu2Δ::FRT trp1Δ::FRT</i>            |
| BVGC3   | KKY2001       | <i>ERG11-3X HA::his3MX6</i> KKY2001                |
| BVGC138 | BVGC3         | <i>pdr1Δ::loxP</i> KKY2001                         |
| BVGC205 | BVGC138       | <i>PDR1::loxP</i> KKY2001                          |
| BVGC207 | BVGC138       | mSRE <i>PDR1::loxP</i> KKY2001                     |
| BVGC209 | BVGC205       | <i>PDR1::loxP cdr1Δ</i> KKY2001                    |
| BVGC213 | BVGC207       | mSRE <i>PDR1::loxP cdr1Δ</i> KKY2001               |
| BVGC268 | BVGC213       | mSRE <i>PDR1::loxP cdr1Δ</i> KKY2001 <i>LEU2</i>   |
| BVGC59  | BVGC3         | <i>upc2AΔ</i> KKY2001                              |
| BVGC82  | BVGC59        | <i>UPC2A-3X HA-UPC2A::loxP</i> KKY2001             |
| BVGC84  | BVGC59        | <i>UPC2A-3X HA-G898D UPC2A::loxP</i> KKY2001       |
| BVGC259 | KKY2001       | <i>pdr1Δ::loxP cdr1Δ::loxP</i> KKY2001             |
| BVGC328 | BVGC259       | <i>pdr1Δ::loxP cdr1Δ::loxP</i> KKY2001 <i>LEU2</i> |

1090

1091 **Table 1.** Strains and relevant genotypes for *C. glabrata* cells used in this study.

1092

| Gene         | baseMean | log2Fold Change | padj       | SRE | Gene  | Sc homologue | Function                                                |
|--------------|----------|-----------------|------------|-----|-------|--------------|---------------------------------------------------------|
| CAGL0F08965g | 39195.9  | 0.87            | 6.17E-11   | No  |       | MSC7         | Orthologs have role in reciprocal meiotic recombination |
| CAGL0L10714g | 38381.7  | 0.75            | 3.60E-05   | Yes | ERG2  | ERG2         | C-8 sterol isomerase                                    |
| CAGL0J03916g | 9198.9   | 0.71            | 1.54E-06   | No  | HES1  | HES1         | Orthologs have oxysterol binding and sterol transport   |
| CAGL0K03927g | 10420.4  | 0.68            | 0.00029389 | No  | ERG29 | ERG29        | Orthologs have role in ergosterol biosynthetic process  |
| CAGL0M07656g | 50162.8  | 0.67            | 0.00075178 | Yes | ERG5  | ERG5         | Putative C22 sterol desaturase                          |
| CAGL0H04081g | 49335.7  | 0.67            | 0.00075178 | Yes | ERG13 | ERG13        | 3-hydroxy-3-methylglutaryl coenzyme A synthase          |
| CAGL0L03828g | 8696.4   | 0.6             | 0.00493476 | Yes | CYB5  | CYB5         | Orthologs have, role in ergosterol biosynthetic process |
| CAGL0A00429g | 36653.4  | 0.59            | 0.00237241 | No  | ERG4  | ERG4         | Putative C24 sterol reductase                           |
| CAGL0K04455g | 236.3    | 0.52            | 0.04177062 | No  |       | SPR3         | Orthologs have role in ascospore formation              |
| CAGL0H04653g | 119991.9 | 0.5             | 0.0436892  | Yes | ERG6  | ERG6         | C24 sterol methyltransferase                            |
| CAGL0L12364g | 37830.9  | 0.5             | 0.01611664 | No  | ERG10 | ERG10        | Orthologs have role in ergosterol biosynthetic process  |

1093

1094 Table 2. **Genes induced by log<sub>2</sub> of 0.5 or greater in the presence of the G898D *UPC2A*.** RNA-seq was used to  
1095 compare the levels of transcripts produced in the presence of the G898D *UPC2A* allele and the ratio of these mRNA  
1096 levels/those seen in the presence of wild-type *UPC2A* presented as log<sub>2</sub> Fold Change.

1097

1098

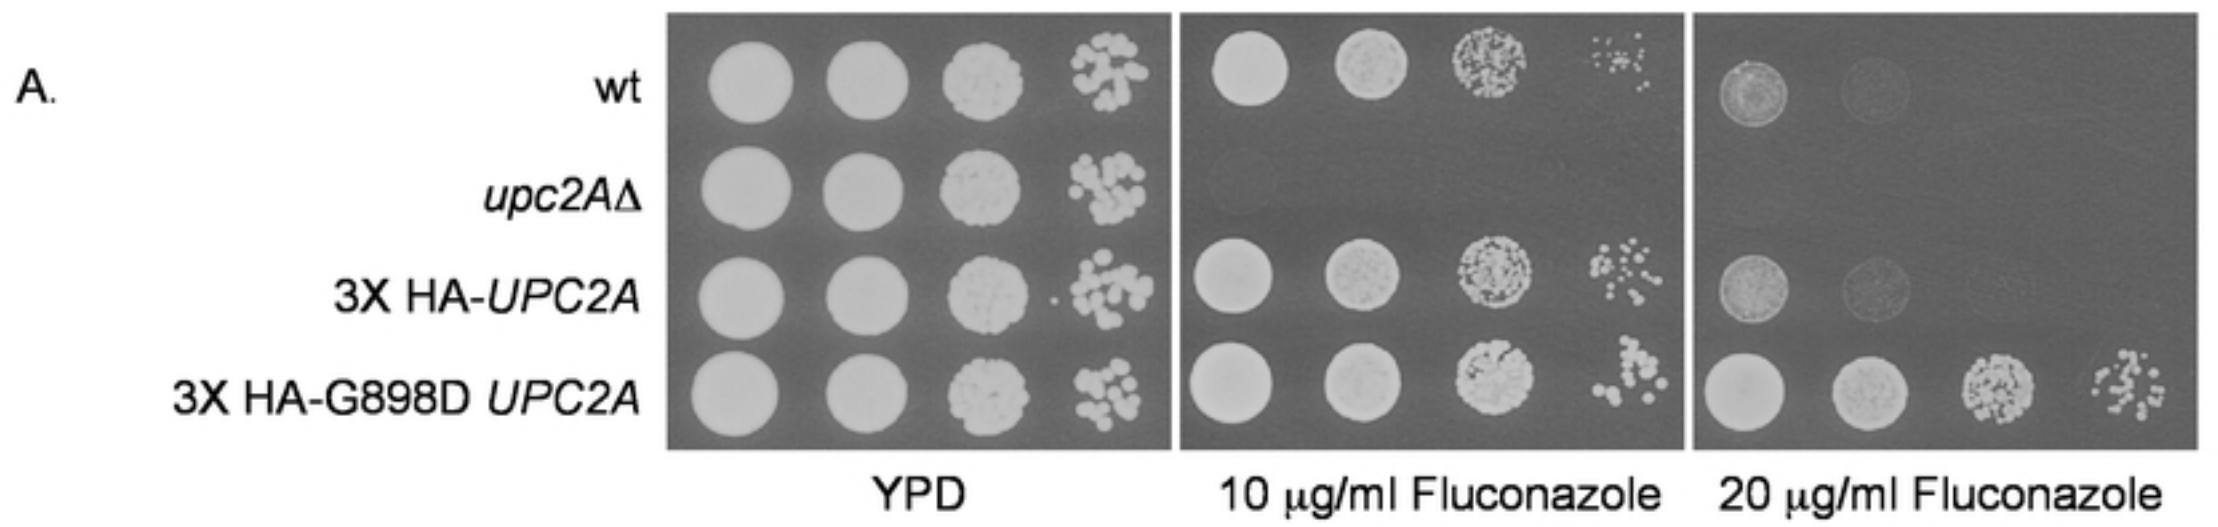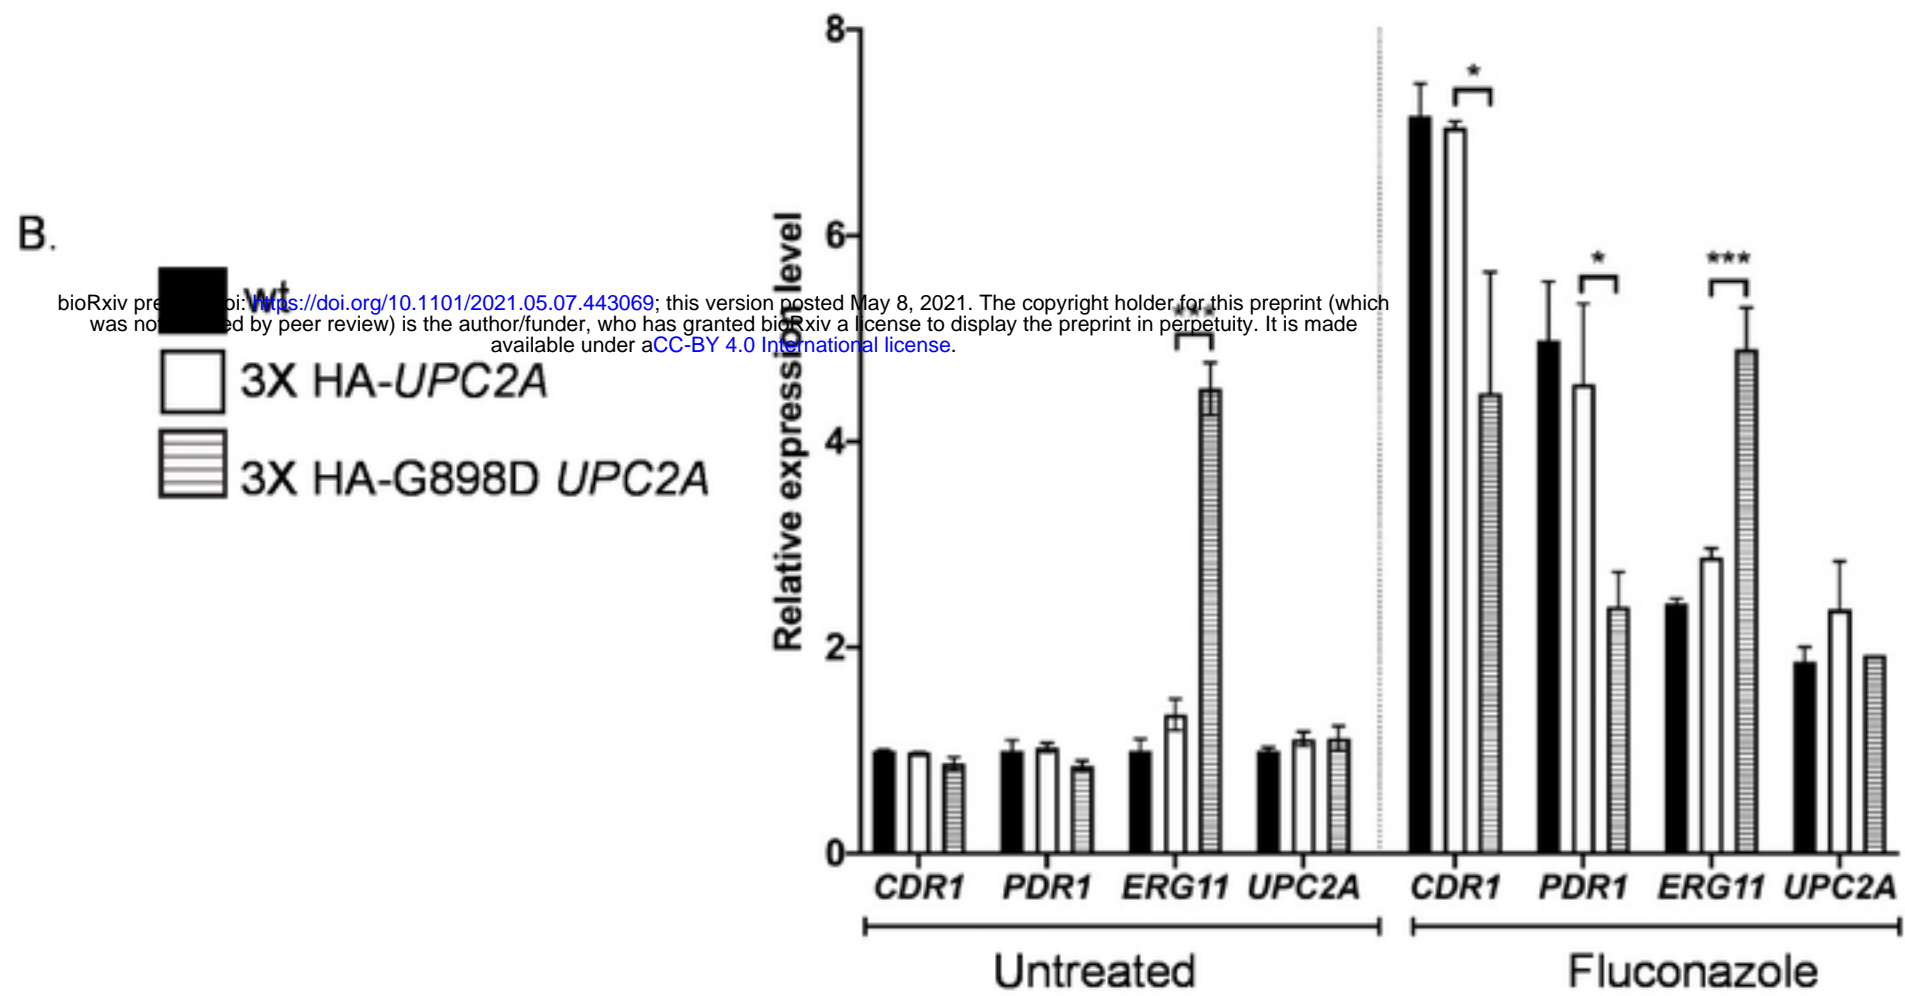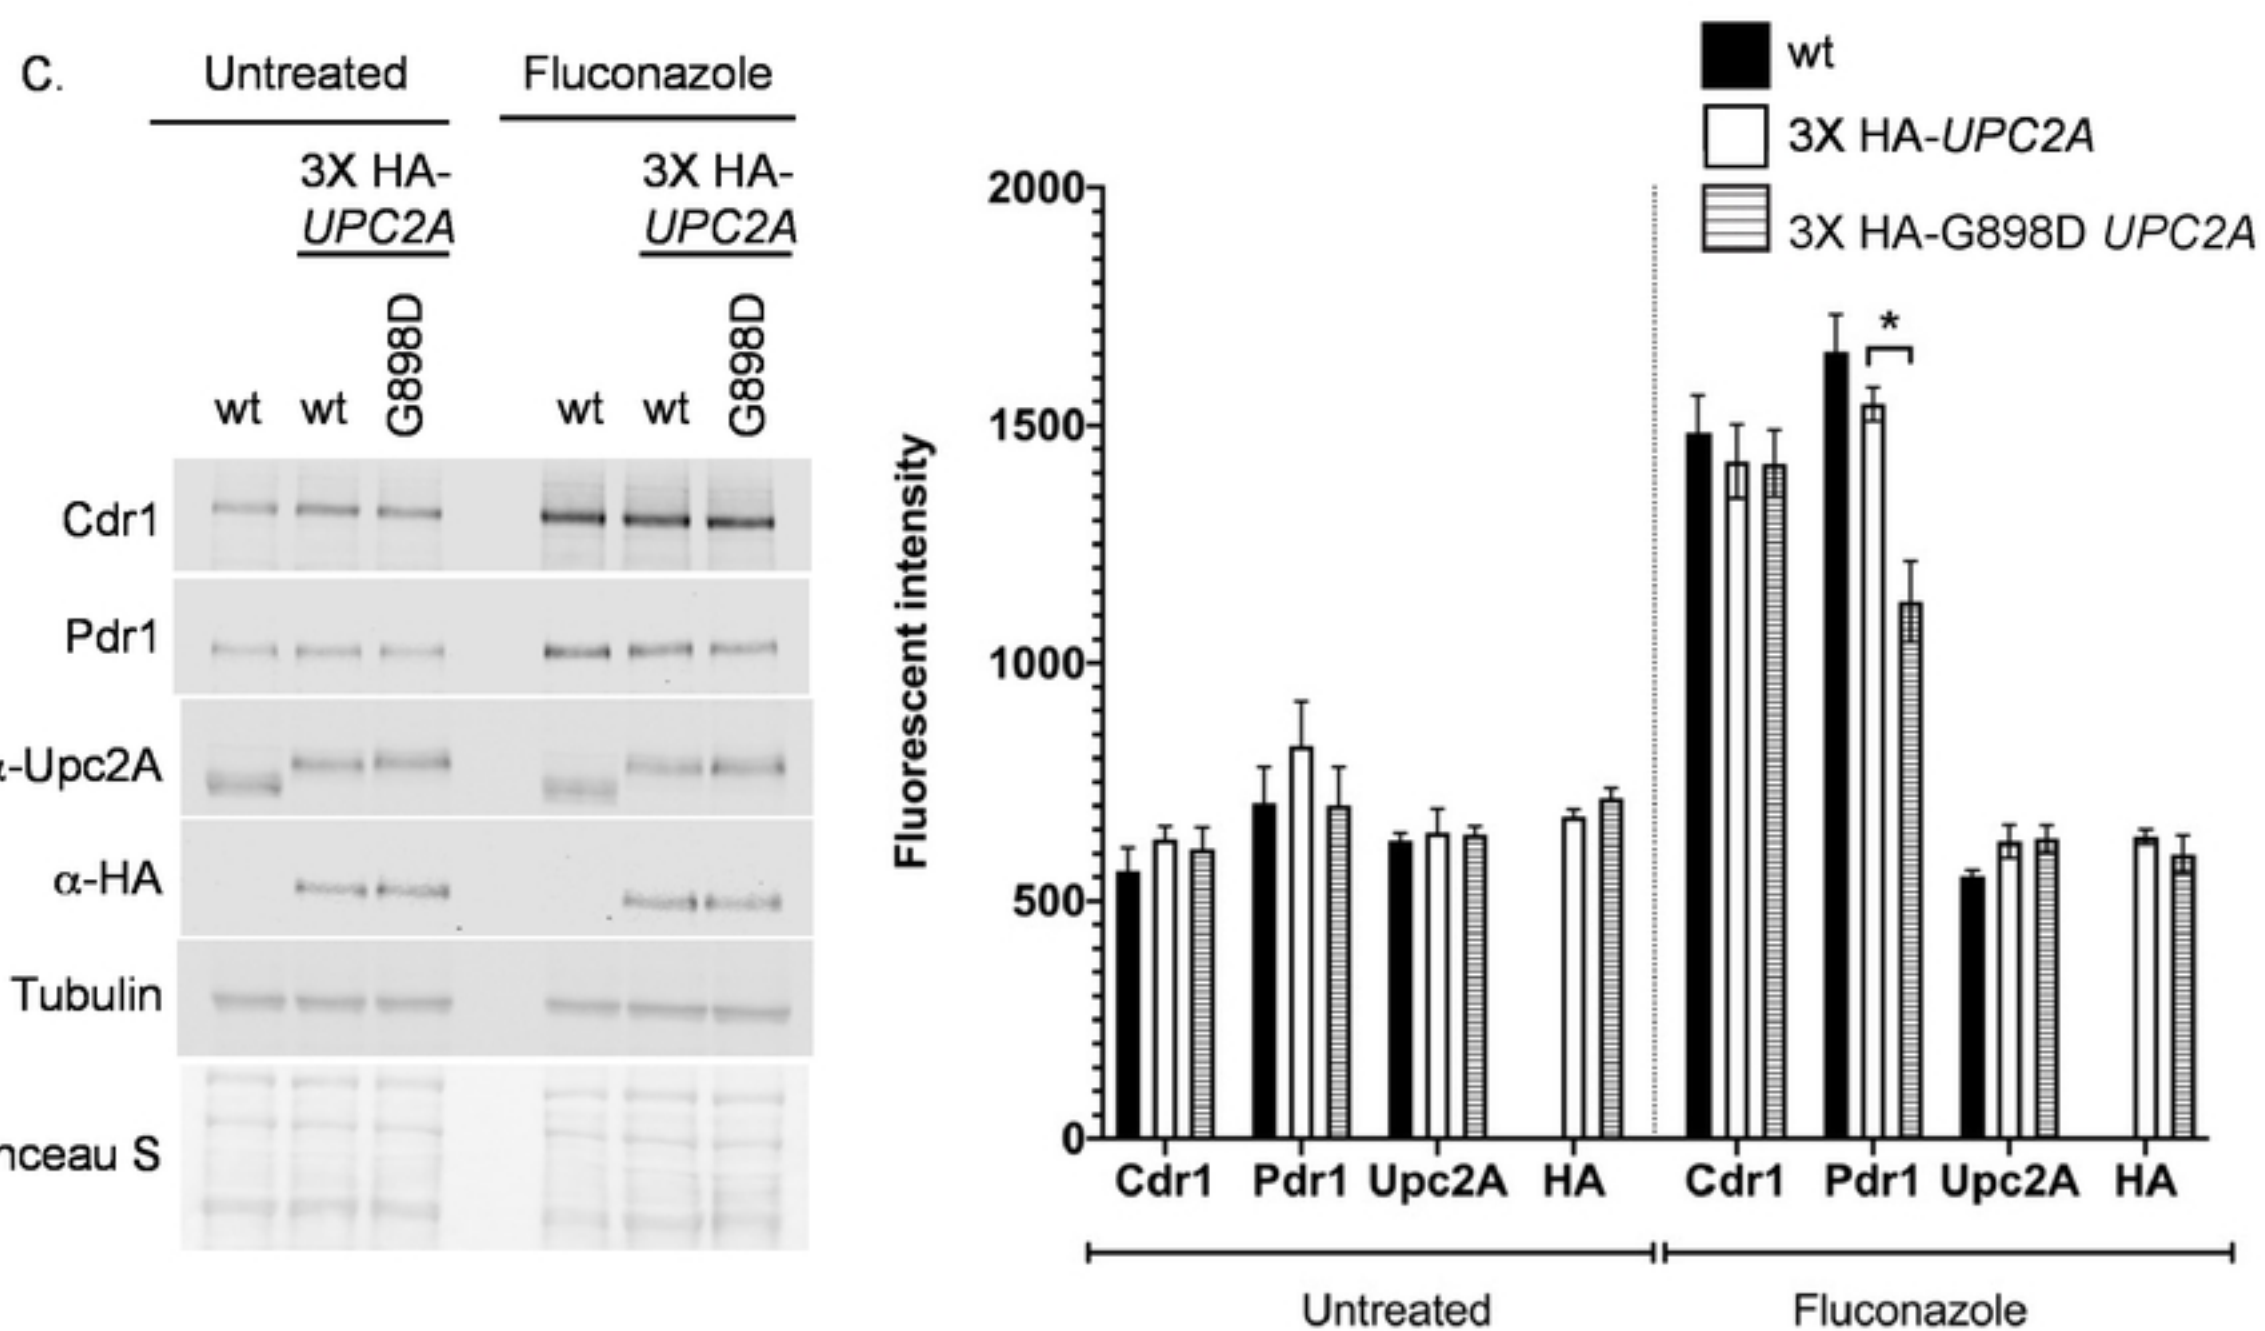



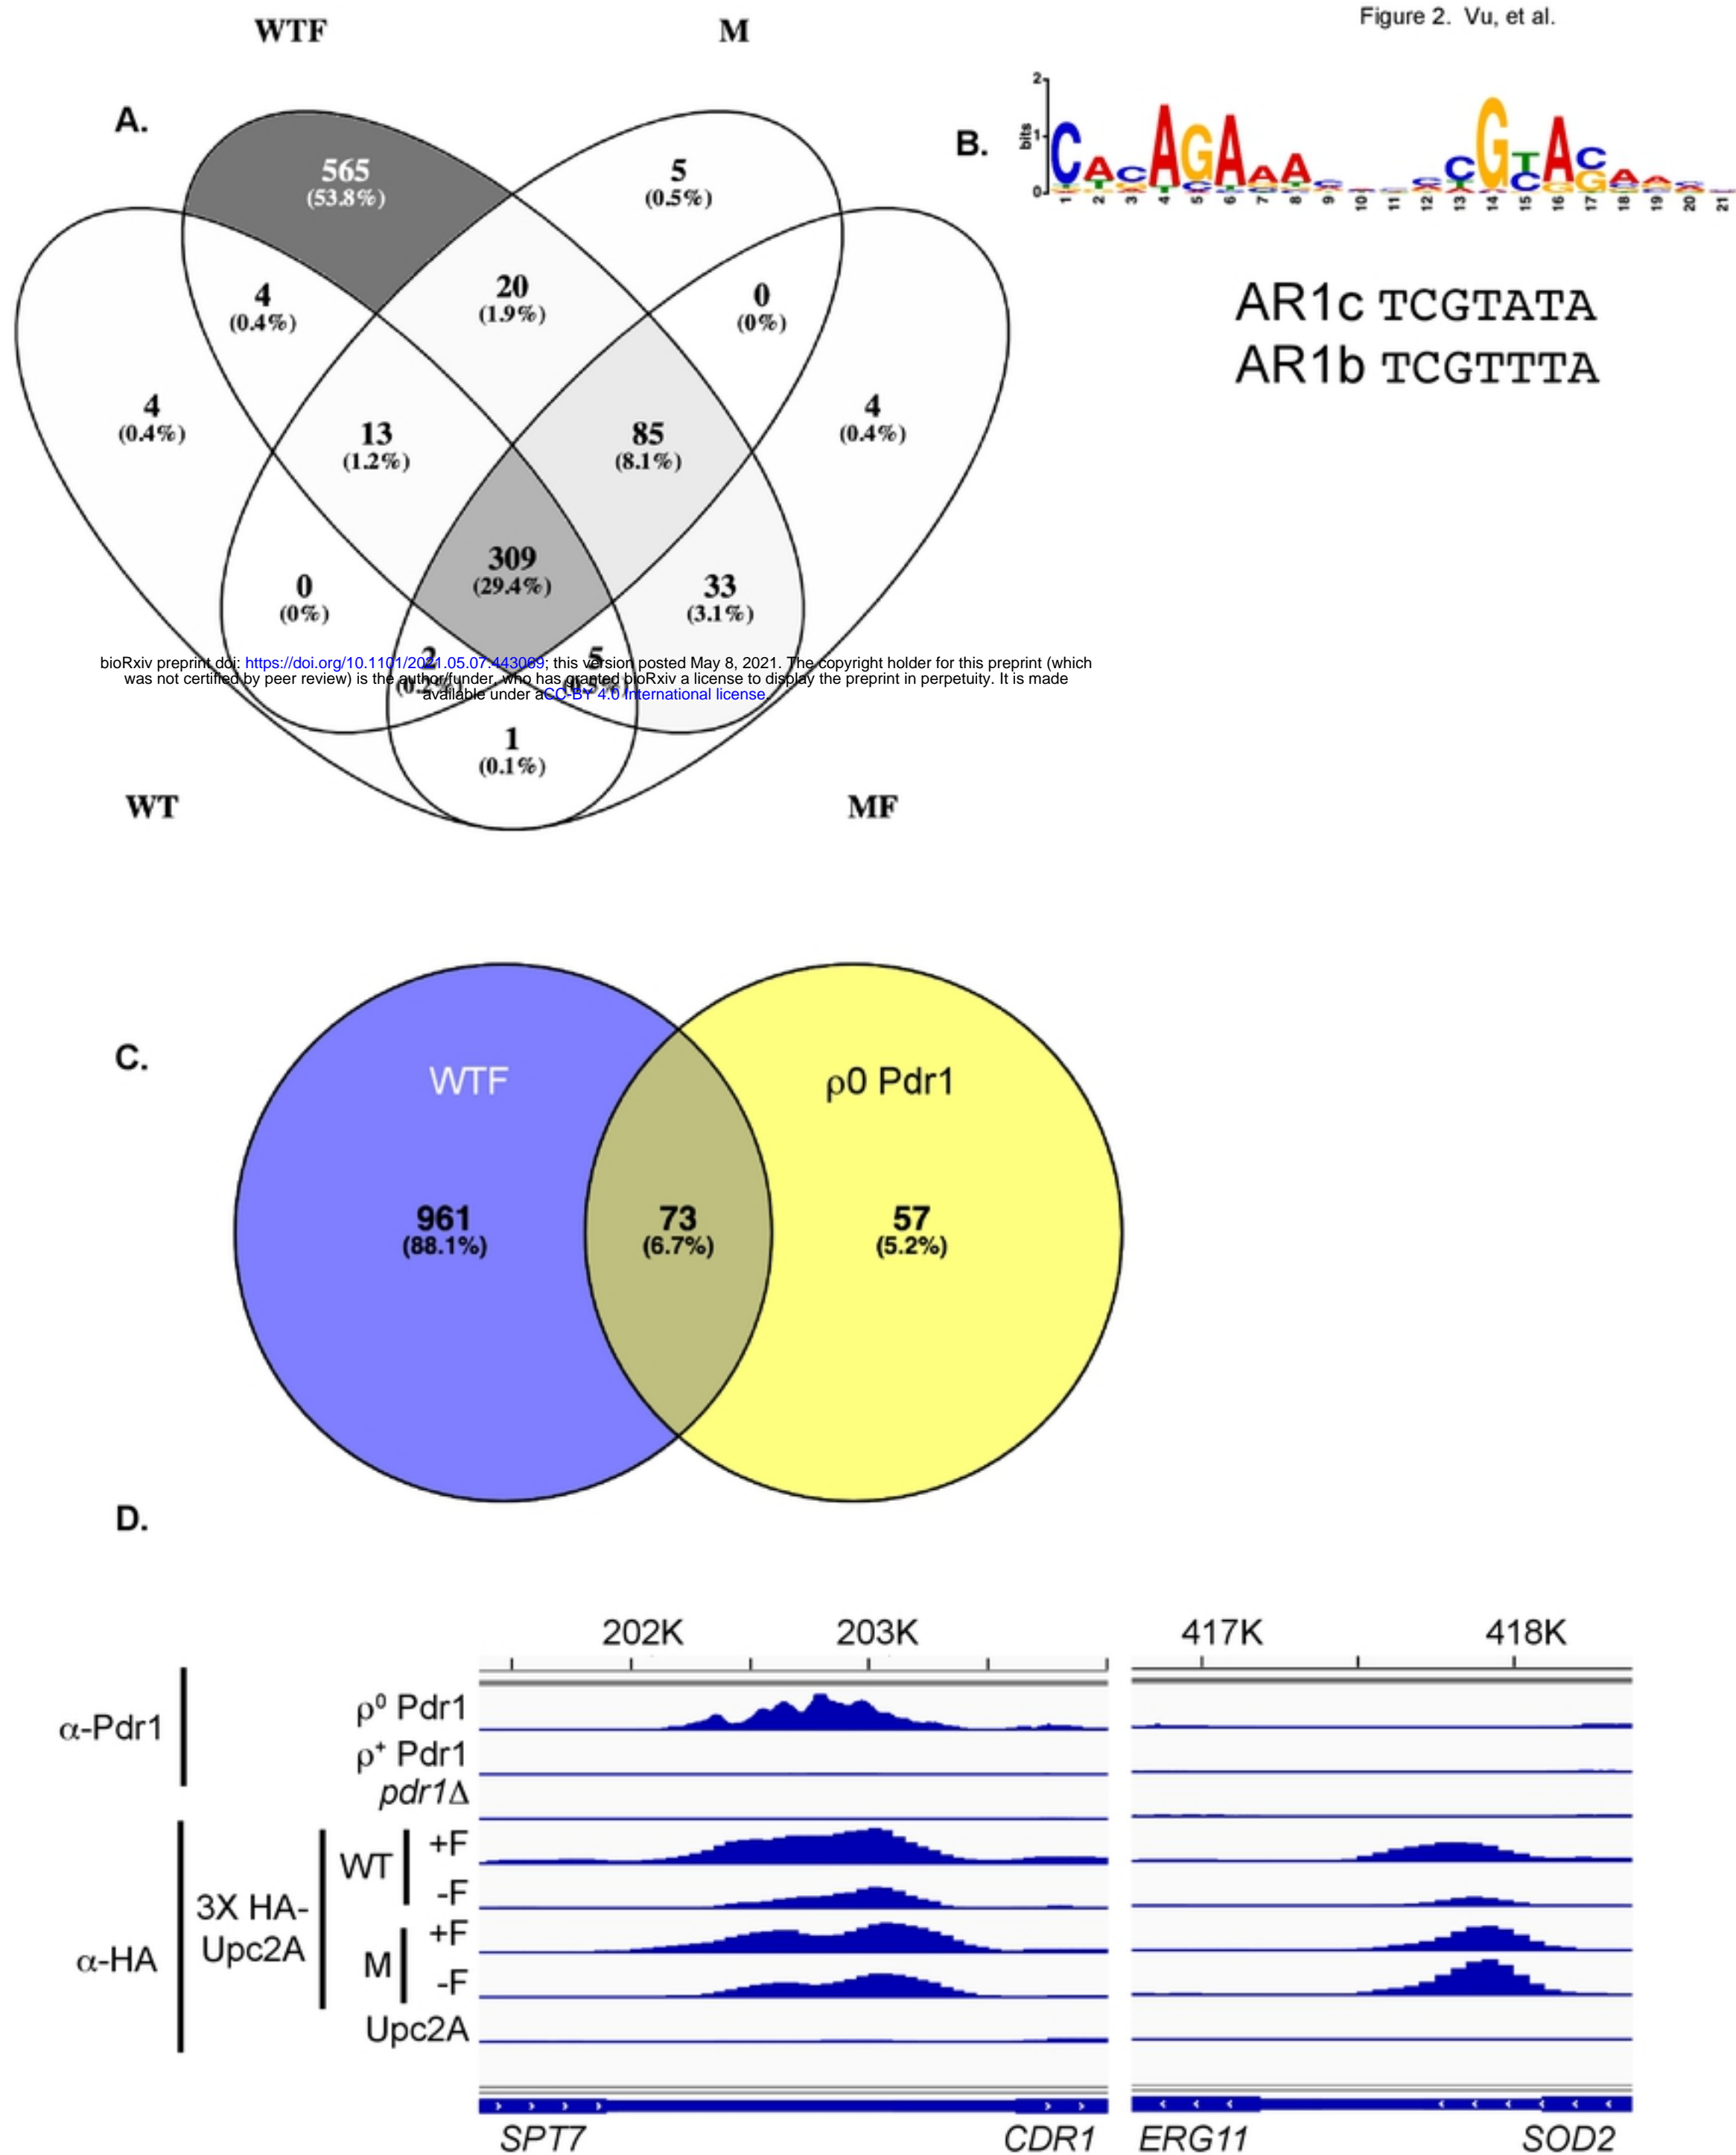

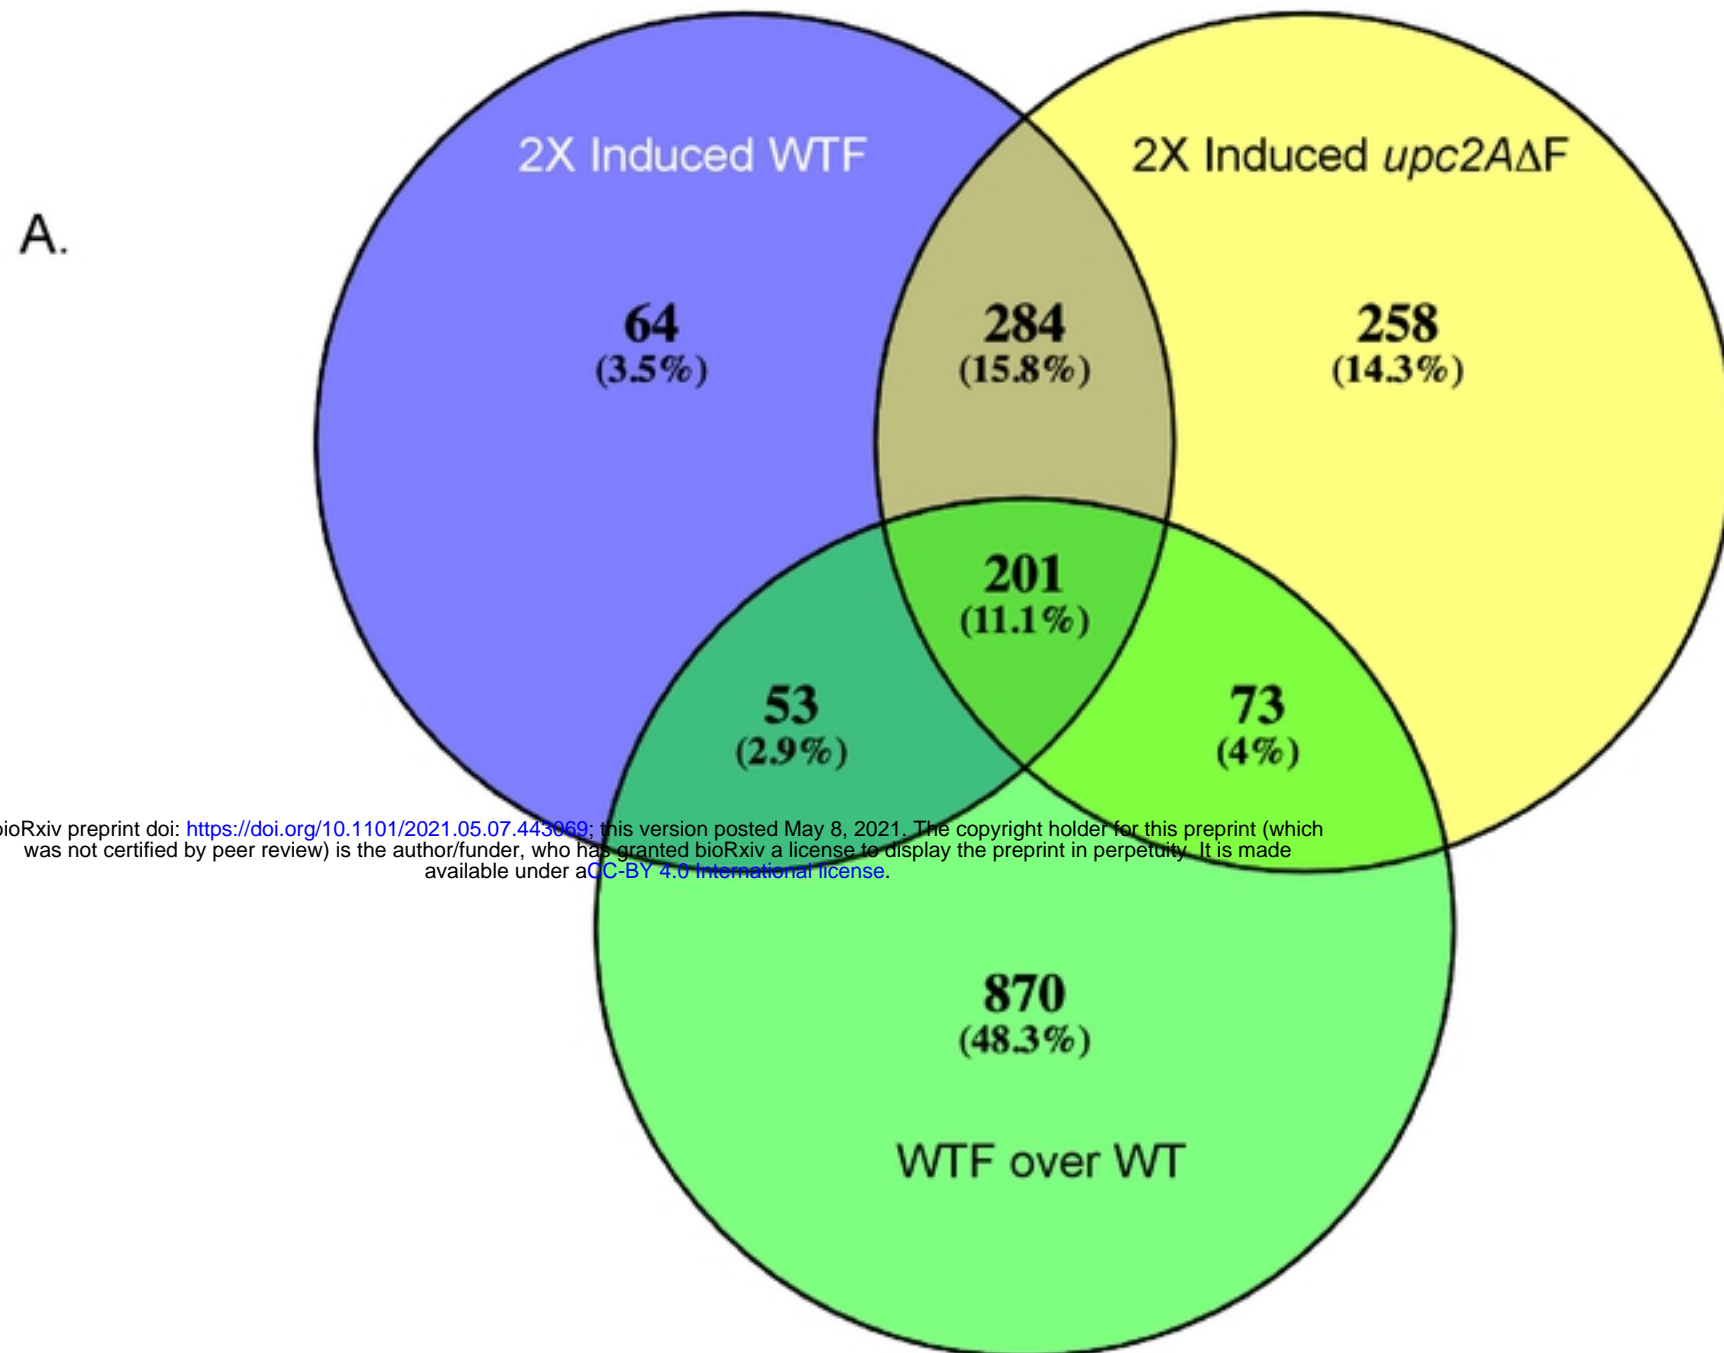

bioRxiv preprint doi: <https://doi.org/10.1101/2021.05.07.443069>; this version posted May 8, 2021. The copyright holder for this preprint (which was not certified by peer review) is the author/funder, who has granted bioRxiv a license to display the preprint in perpetuity. It is made available under aCC-BY 4.0 International license.

B.

| SRE            | Log2 FLC wt | Log2 FLC <i>upc2A</i> | Cg    | Sc    | Product                                                       |
|----------------|-------------|-----------------------|-------|-------|---------------------------------------------------------------|
| ● CAGL0D05940g | 3.6         | 3.6                   | ERG1  | ERG1  | Squalene epoxidase                                            |
| ● CAGL0L12364g | 0.5         | -1.4                  | ERG10 | ERG10 | Acetyl-CoA C-acetyltransferase activity                       |
| ● CAGL0E04334g | 1.9         | -1.4                  | ERG11 | ERG11 | Cytochrome P-450 lanosterol 14-alpha-demethylase              |
| ● CAGL0H04081g | 0.3         | -1.6                  | ERG13 | ERG13 | 3-hydroxy-3-methylglutaryl coenzyme A synthase                |
| ● CAGL0L10714g | 2.2         | -1.3                  | ERG2  | ERG2  | C-8 sterol isomerase                                          |
| ● CAGL0L00319g | 0.4         | -0.9                  | ERG20 | ERG20 | Putative farnesyl pyrophosphate synthetase                    |
| ● CAGL0F01793g | 2.6         | 0.1                   | ERG3  | ERG3  | Delta 5,6 sterol desaturase                                   |
| ● CAGL0A00429g | 1.6         | -2.0                  | ERG4  | ERG4  | C24 sterol reductase                                          |
| ● CAGL0M07656g | 1.2         | -0.9                  | ERG5  | ERG5  | C22 sterol desaturase                                         |
| ● CAGL0H04653g | 0.8         | -1.4                  | ERG6  | ERG6  | C24 sterol methyltransferase                                  |
| ● CAGL0F03993g | 0.9         | 0.7                   | ERG8  | ERG8  | Phosphomevalonate kinase                                      |
| ● CAGL0M07095g | 1.1         | -0.3                  | ERG9  | ERG9  | Squalene synthase                                             |
| ● CAGL0L11506g | 0.1         | -1.9                  | HMG1  | HMG1  | Hydroxymethylglutaryl-CoA reductase                           |
| ● CAGL0M01760g | 3.6         | 2.2                   | CDR1  | PDR5  | Multidrug transporter of ATP-binding cassette ABC superfamily |
| ● CAGL0F02717g | 2.7         | 0.7                   | PDH1  | PDR15 | Multidrug ABC transporter                                     |
| ● CAGL0A00451g | 2.2         | 1.8                   | PDR1  | PDR1  | Zinc finger transcription factor                              |
| ● CAGL0I04862g | 1.4         | 0.4                   | SNQ2  | SNQ2  | Multidrug ABC transporter                                     |
| ● CAGL0K00715g | 3.4         | 4.4                   | RTA1  | RTA1  | 7 transmembrane domain protein                                |
| ● CAGL0G08624g | 0.9         | 2.1                   | QDR2  | QDR1  | Major Facilitator Superfamily transporter                     |
| ● CAGL0J07436g | -0.2        | -1.7                  | PDR16 | PDR16 | Phosphatidylinositol transfer protein                         |
| ● CAGL0L10142g | -1.4        | -2.1                  | RSB1  | RSB1  | 7 transmembrane domain protein                                |

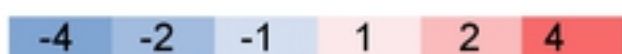

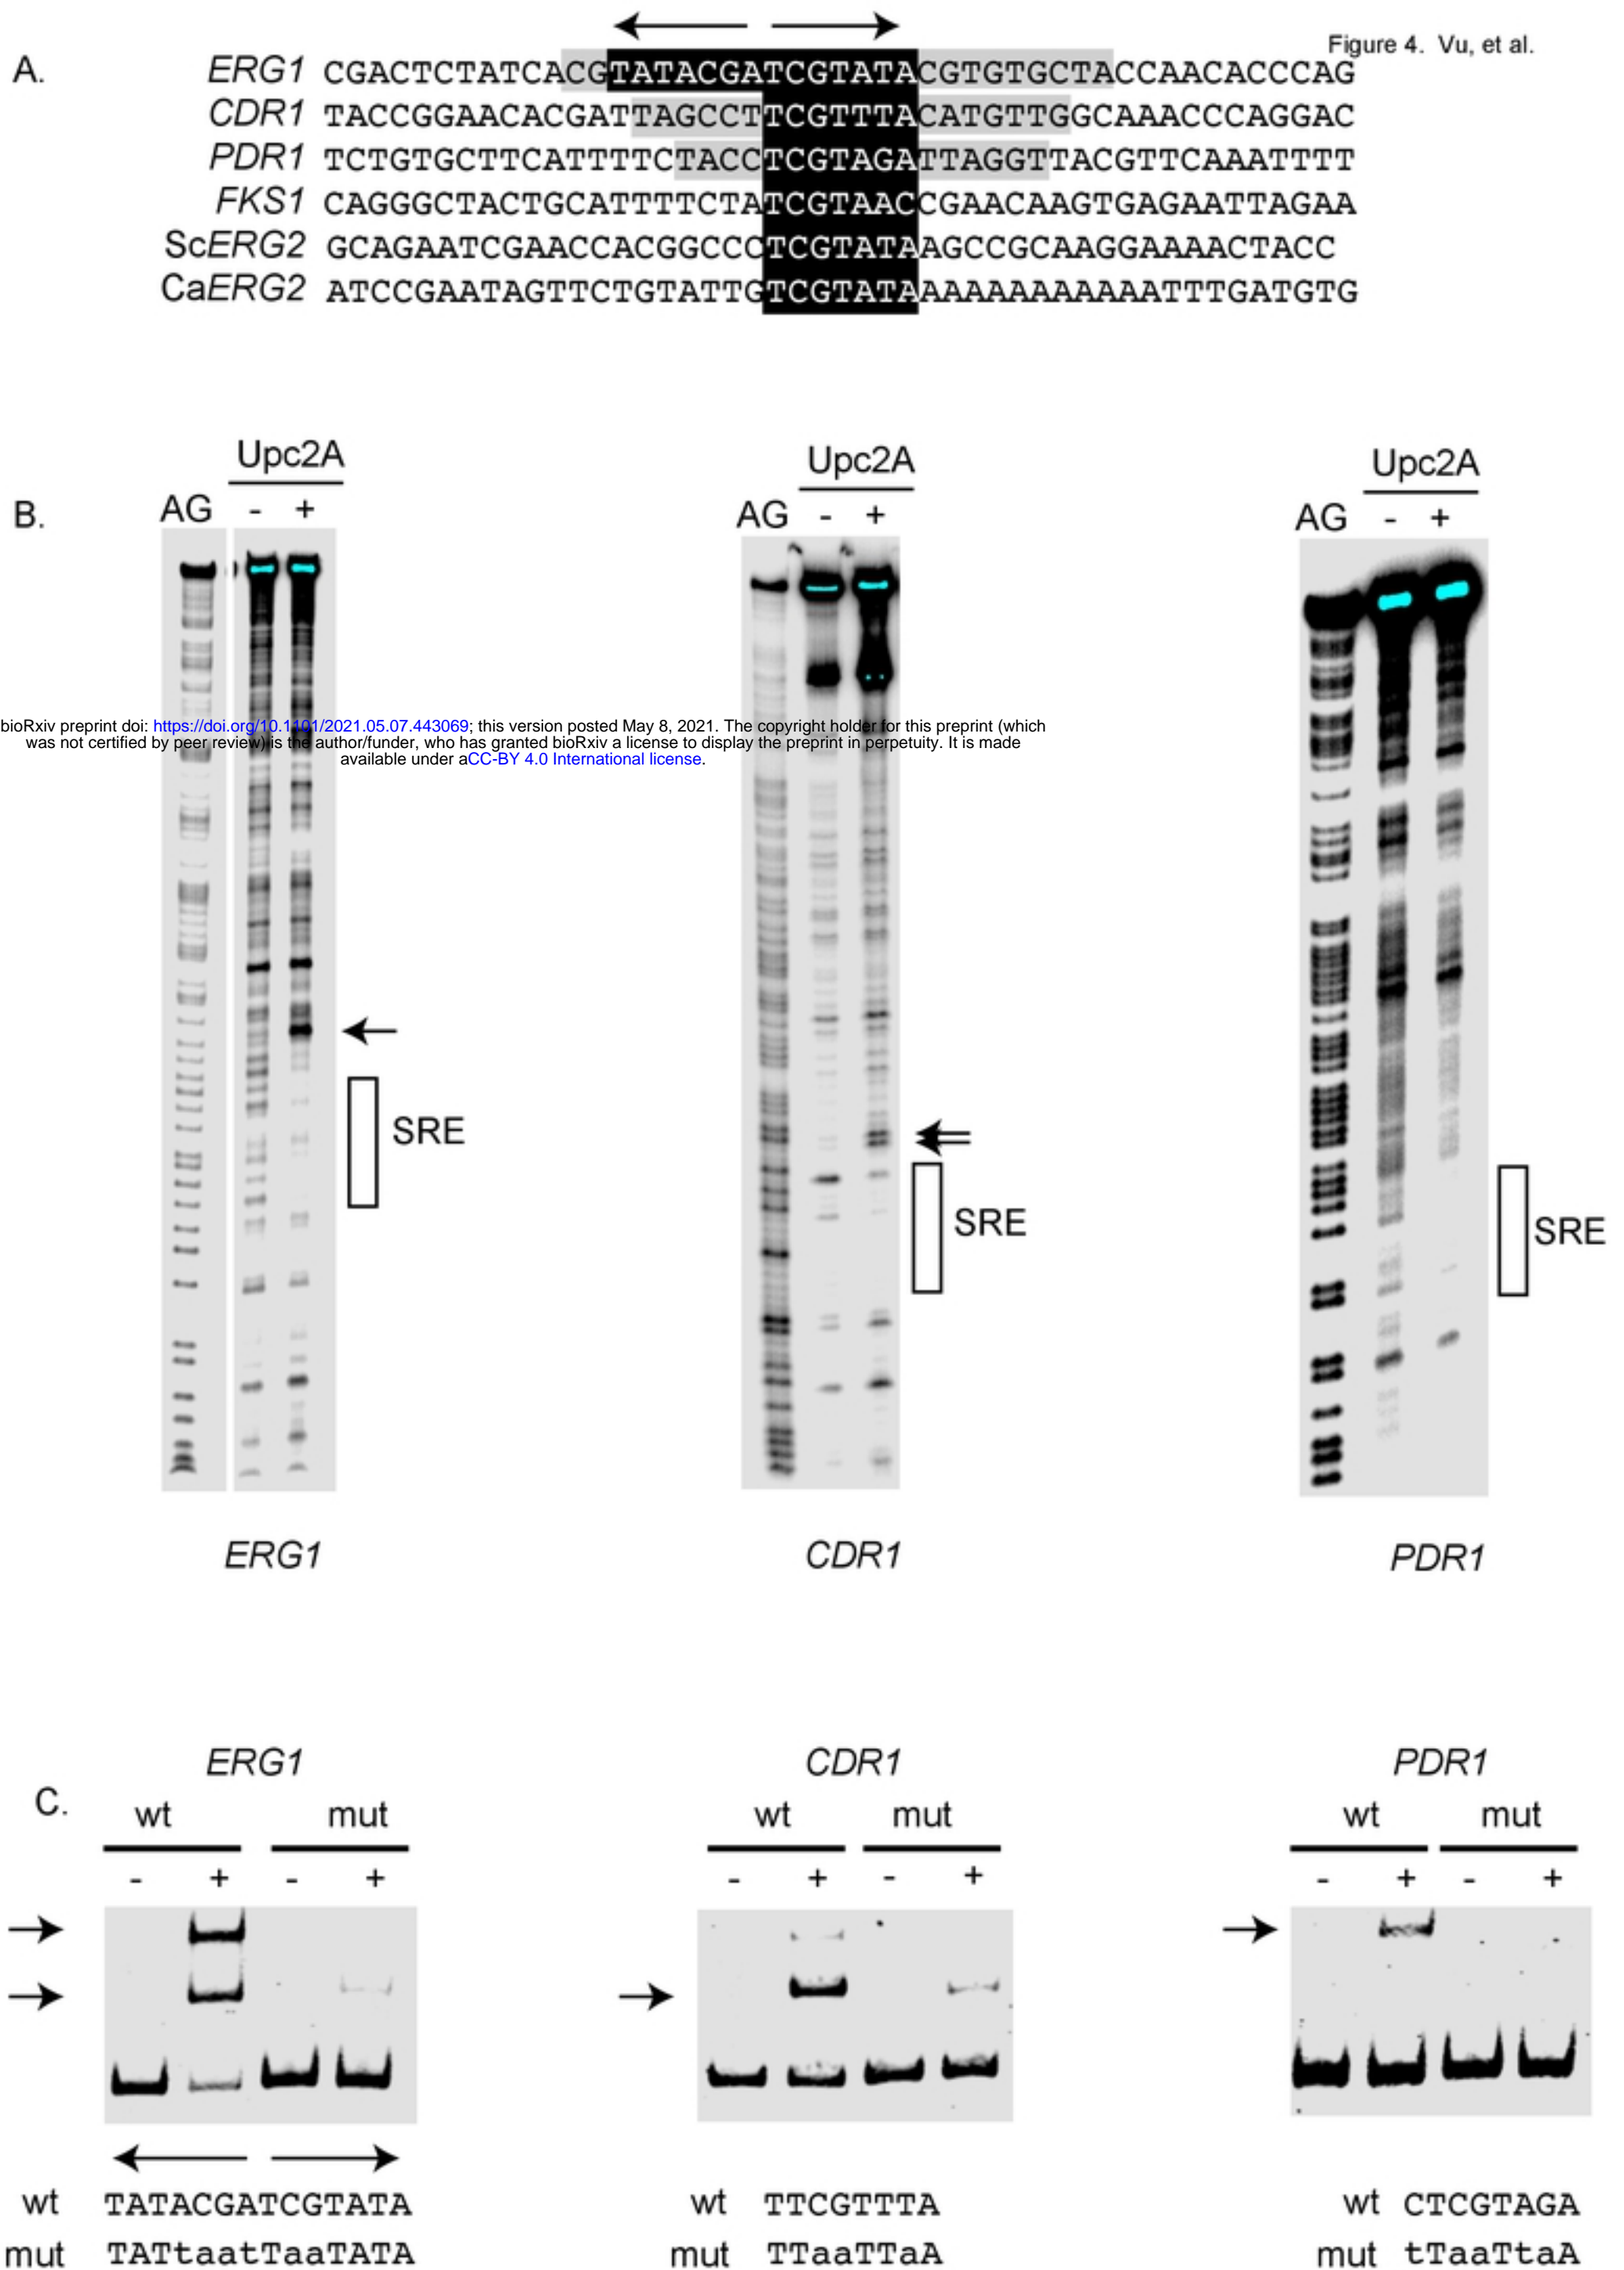

A.

*ERG1-lacZ*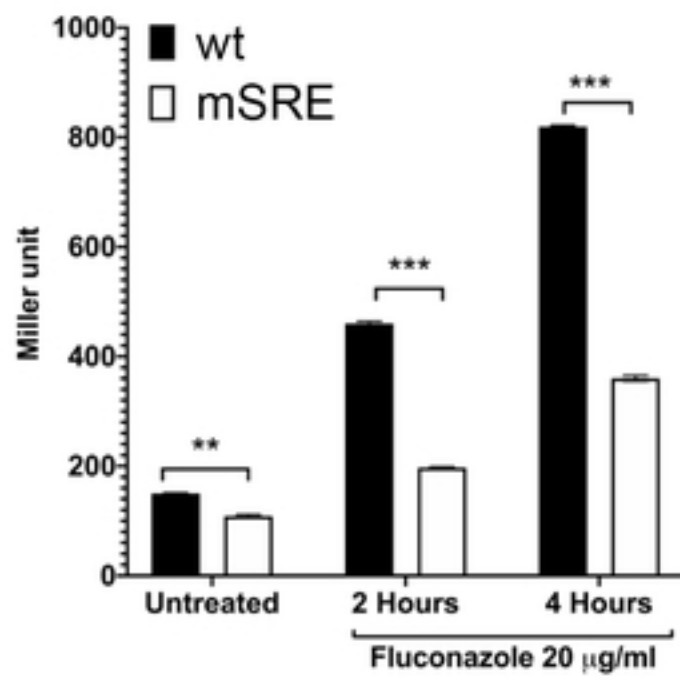*CDR1-lacZ*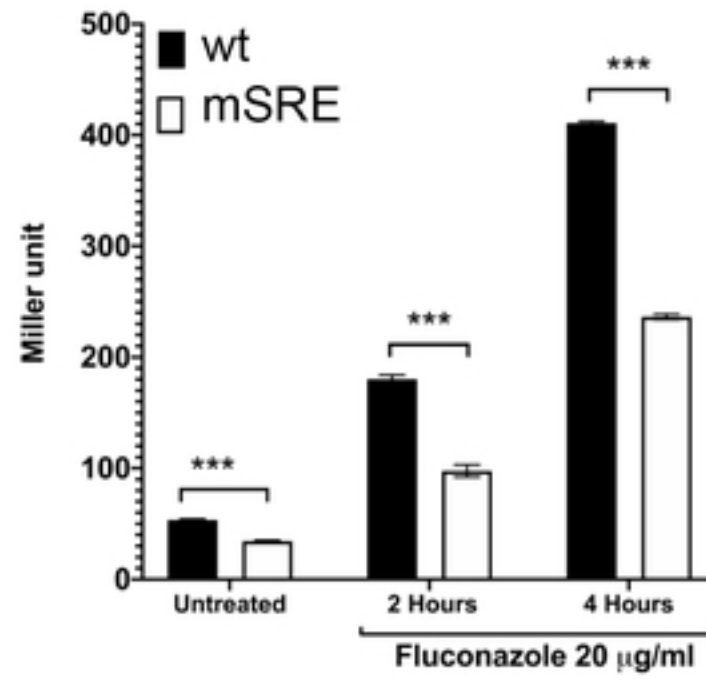*PDR1-lacZ*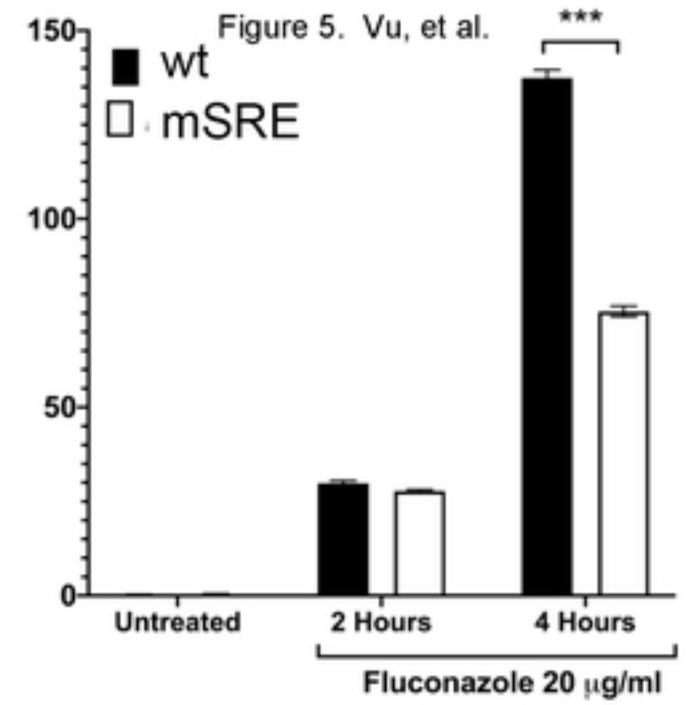

Figure 5. Vu, et al.

B.

bioRxiv preprint doi: <https://doi.org/10.1101/2021.05.07.443069>; this version posted May 8, 2021. The copyright holder for this preprint (which was not certified by peer review) is the author/funder, who has granted bioRxiv a license to display the preprint in perpetuity. It is made available under aCC-BY 4.0 International license.

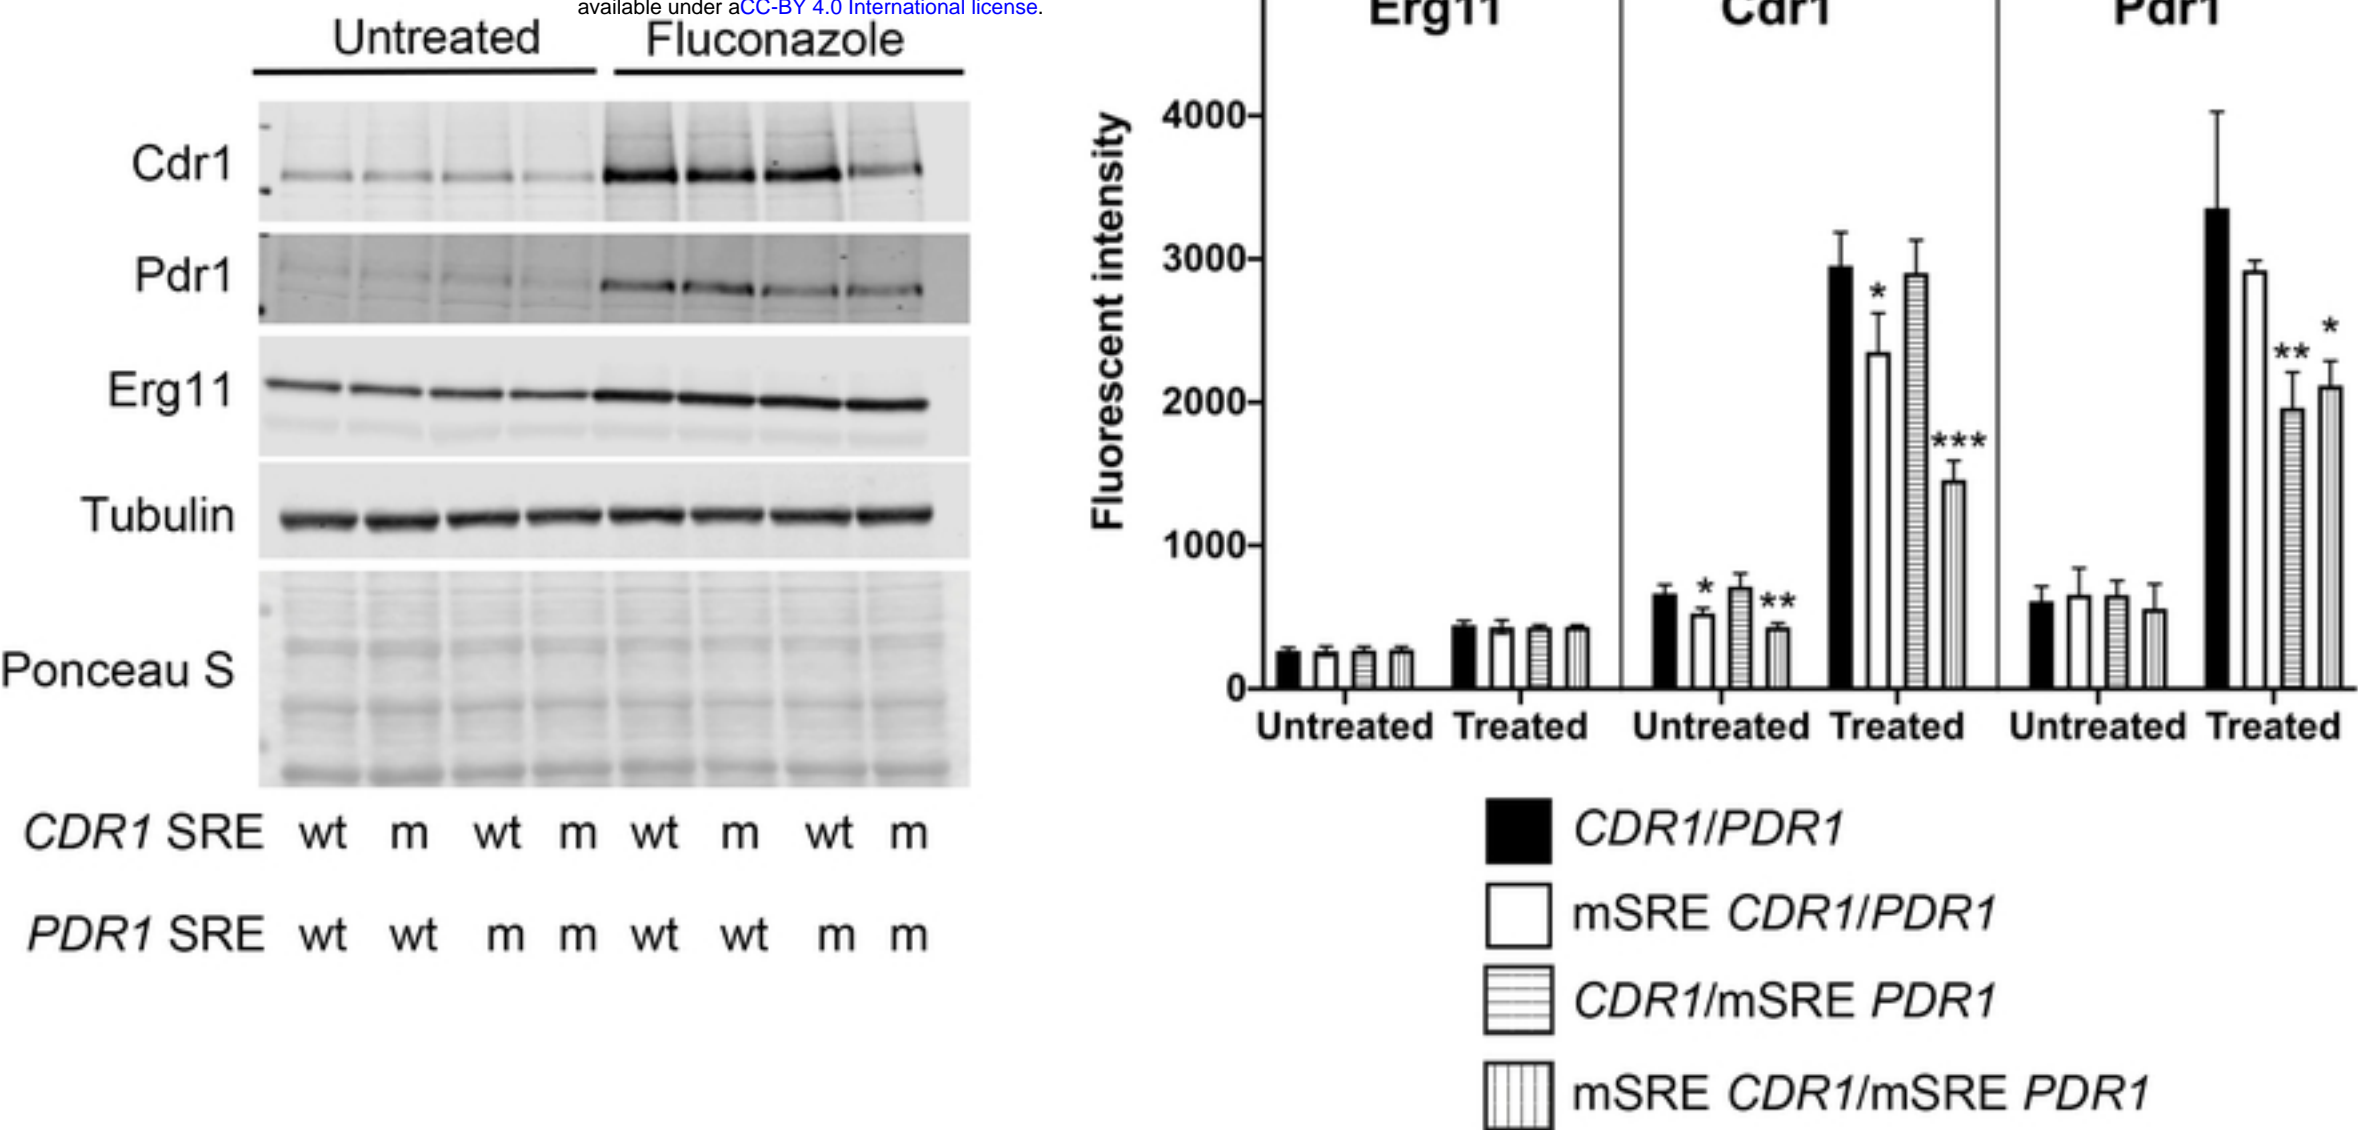

C.

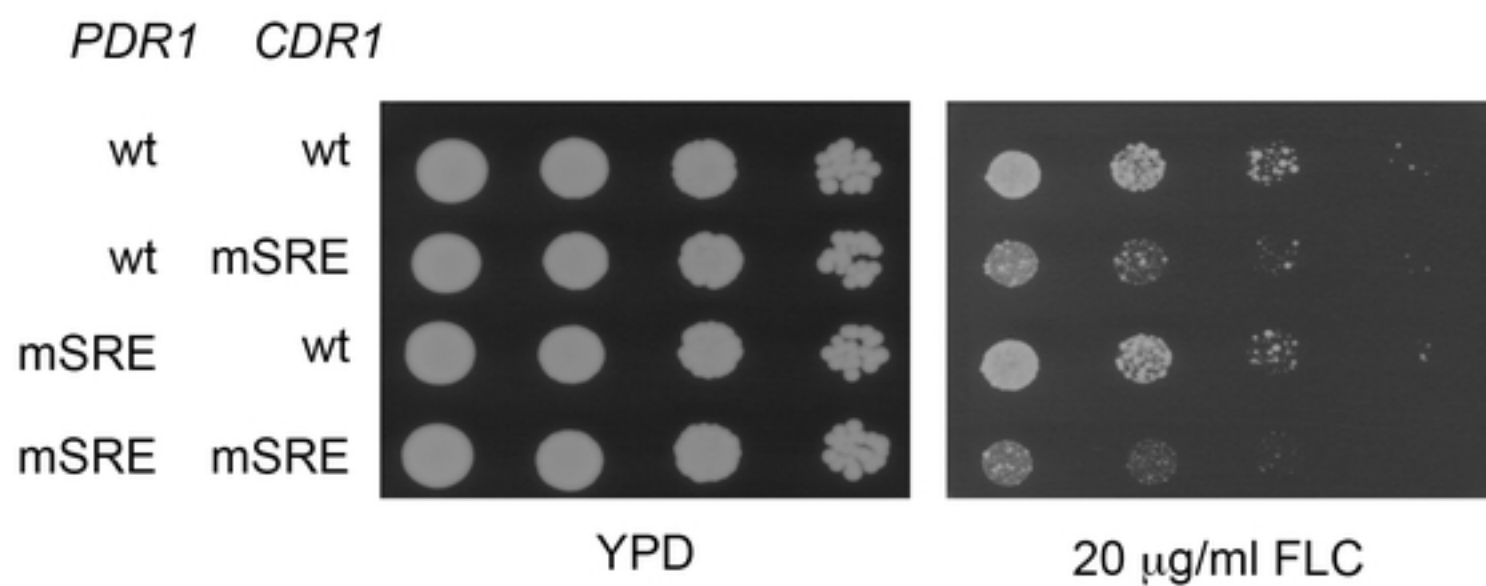

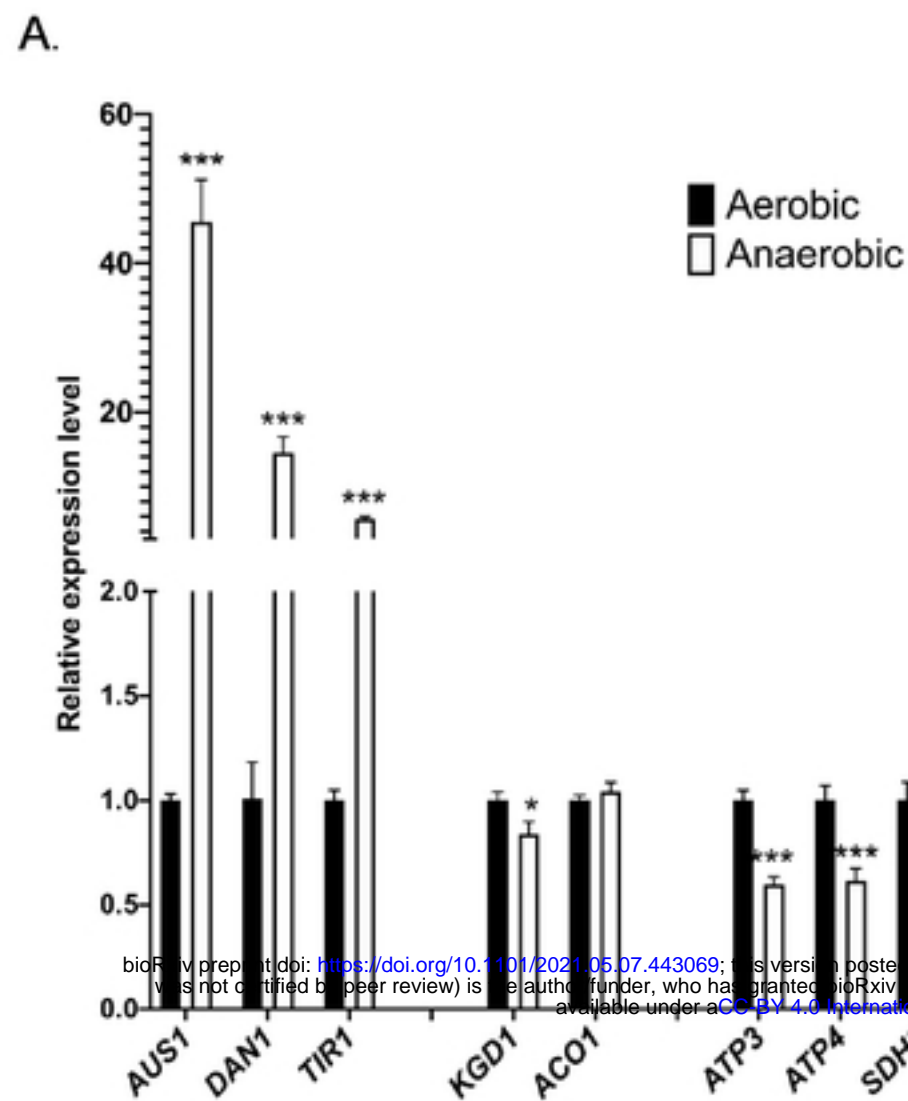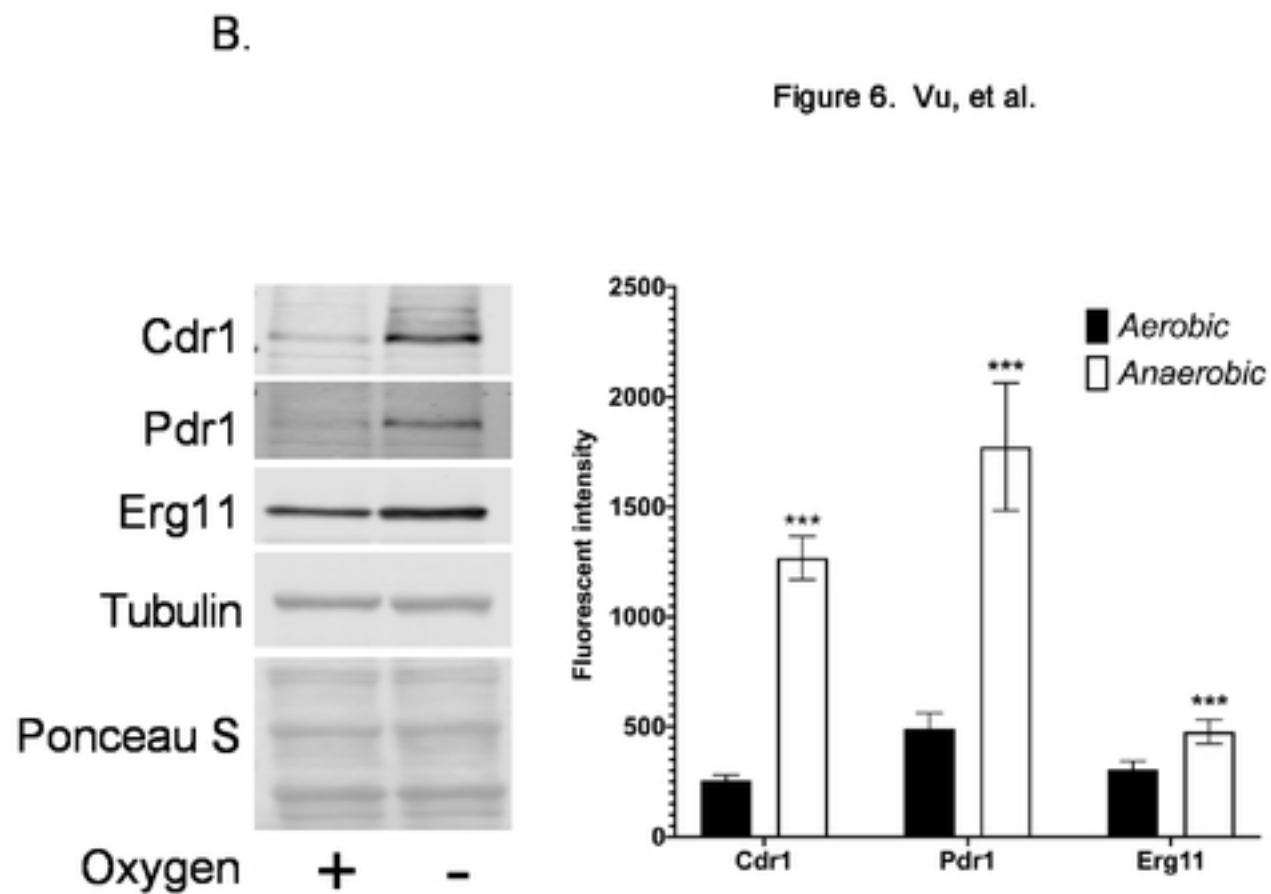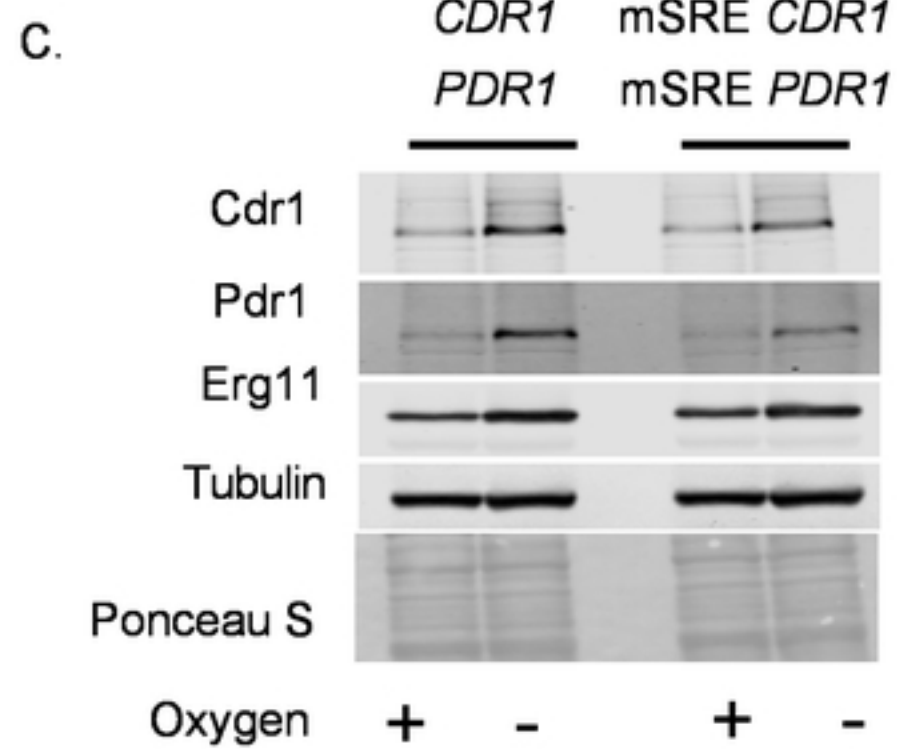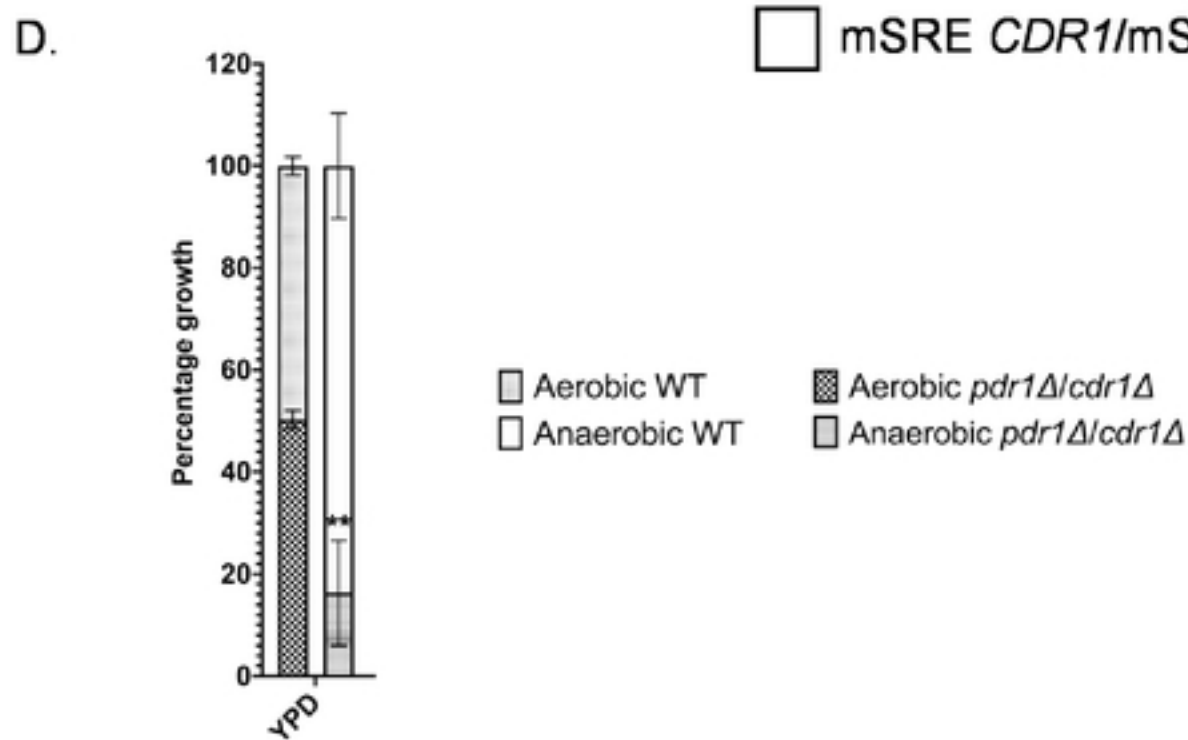

bioRxiv preprint doi: <https://doi.org/10.1101/2021.05.07.443069>; this version posted May 8, 2021. The copyright holder for this preprint (which was not certified by peer review) is the author/funder, who has granted bioRxiv a license to display the preprint in perpetuity. It is made available under aCC-BY 4.0 International license.

A.

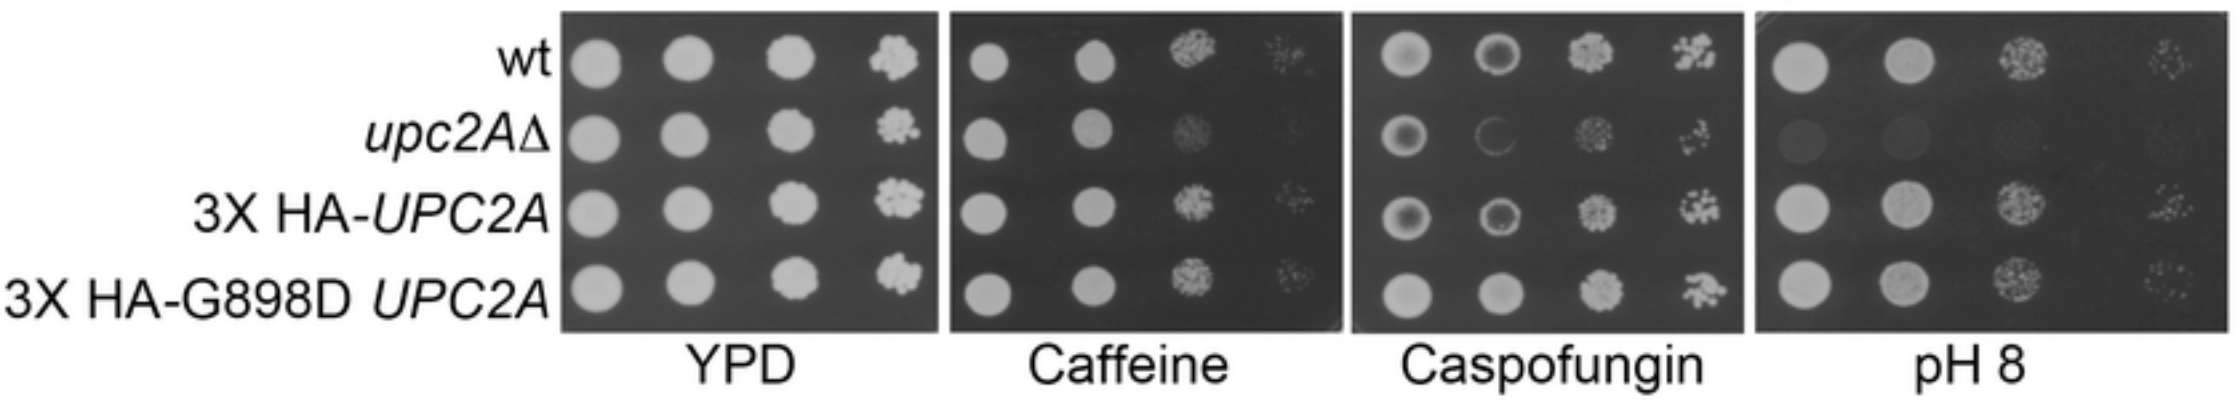

B.

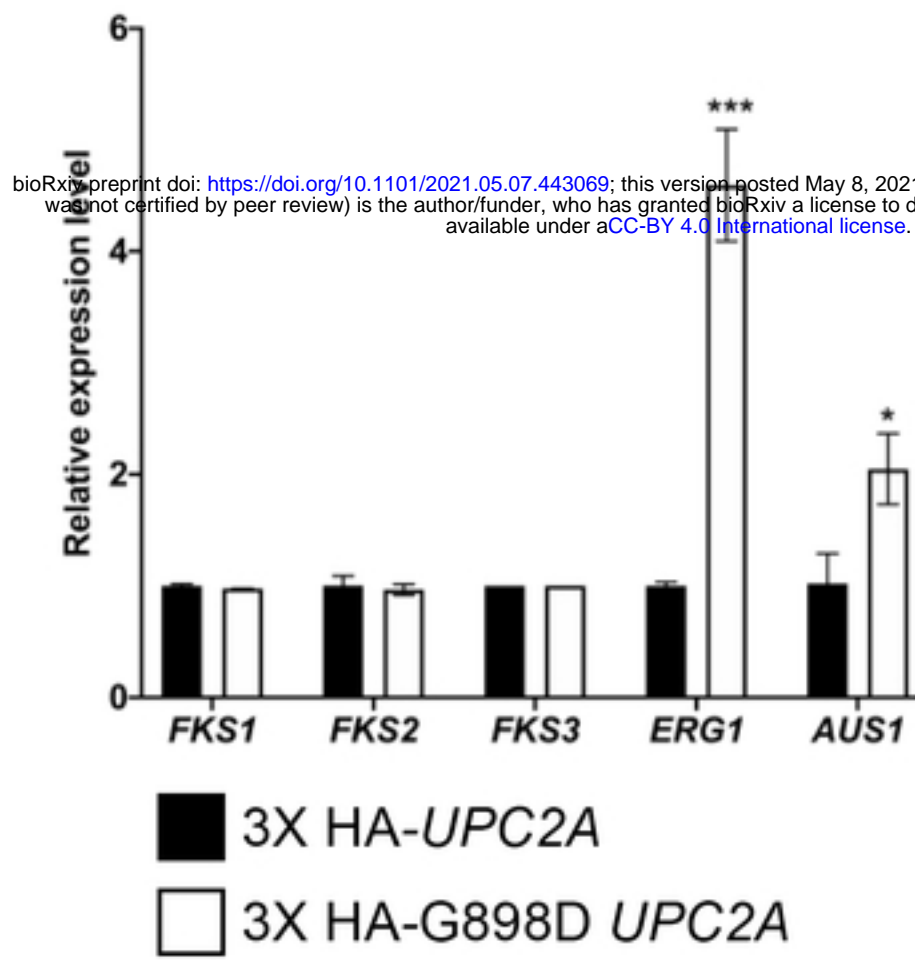

C.

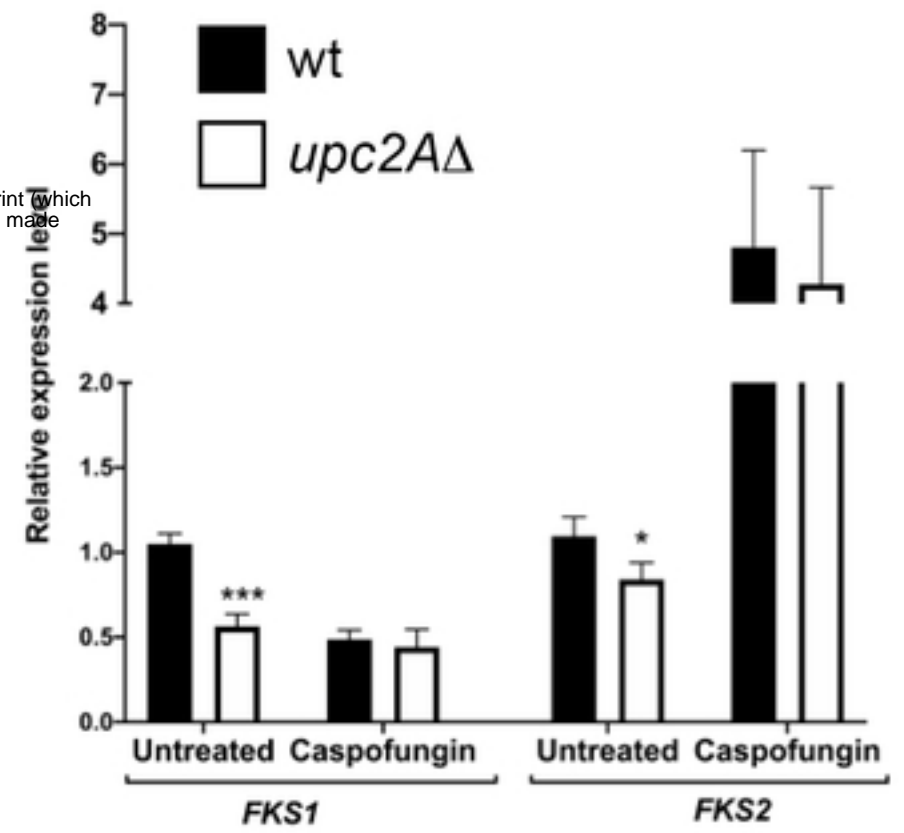

D.

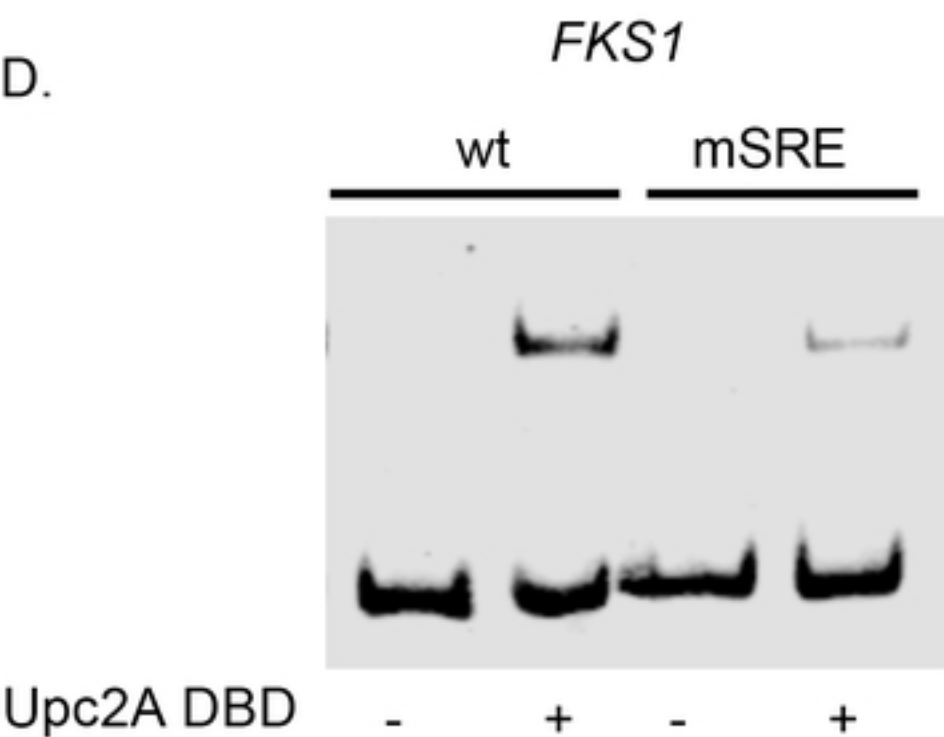

E.

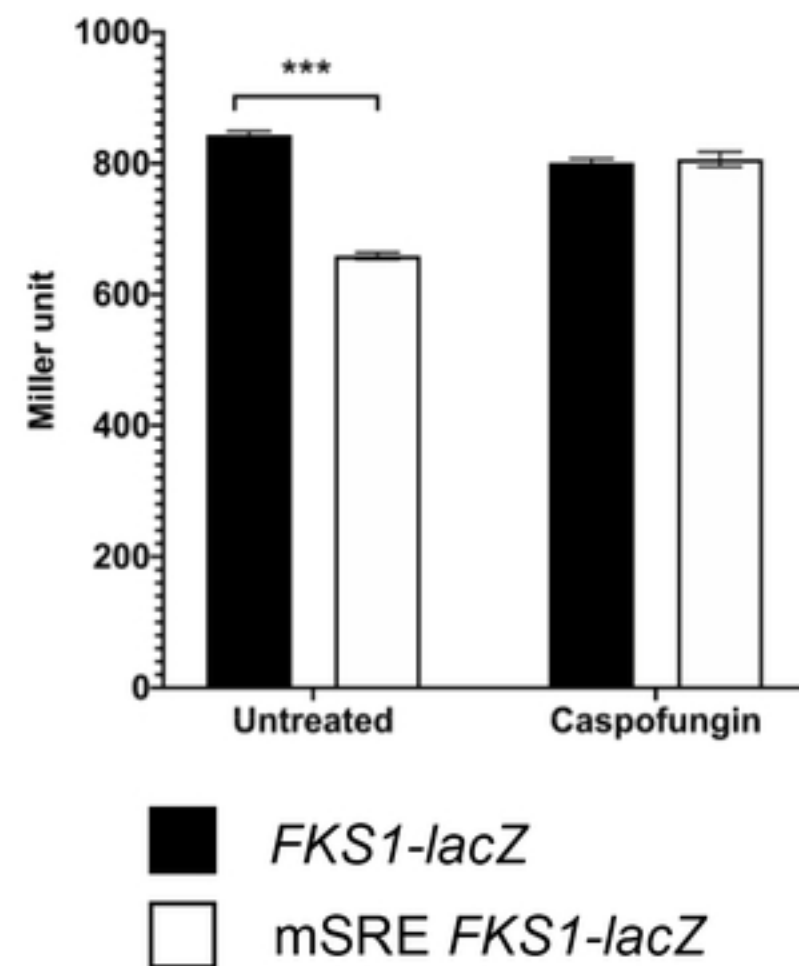

Source: http://biorxiv.org/content/10.1101/2021.05.07.443069v1.full.pdf
